1 **Compromised function of an ESCRT complex promotes endolysosomal escape of tau seeds**  
2 **and propagation of tau aggregation**

3

4 **Authors:**

5 John J. Chen<sup>1</sup>, Diane L. Nathaniel<sup>1</sup>, Preethi Raghavan<sup>2</sup>, Maxine Nelson<sup>1,3</sup>, Ruilin Tian<sup>1,4</sup>, Eric  
6 Tse<sup>1</sup>, Jason Y. Hong<sup>1</sup>, Stephanie K. See<sup>1,5</sup>, Sue-Ann Mok<sup>1,§</sup>, Daniel R. Southworth<sup>1,6</sup>, Lea T.  
7 Grinberg<sup>6</sup>, Jason E. Gestwicki<sup>1,8</sup>, Manuel D. Leonetti<sup>2</sup>, Martin Kampmann<sup>1,2,6,\*</sup>

8

9 **Affiliations:**

10 <sup>1</sup>Institute for Neurodegenerative Diseases, University of California, San Francisco, CA 94158,  
11 USA

12 <sup>2</sup>Chan Zuckerberg Biohub, San Francisco, CA 94158, USA

13 <sup>3</sup>Biomedical Sciences Graduate Program, University of California, San Francisco, CA 94158,  
14 USA

15 <sup>4</sup>Biophysics Graduate Program, University of California, San Francisco, CA 94158, USA

16 <sup>5</sup>Graduate Program in Chemistry and Chemical Biology, University of California, San Francisco,  
17 CA 94158, USA

18 <sup>6</sup>Department of Biochemistry and Biophysics, University of California, San Francisco, CA  
19 94158, USA

20 <sup>7</sup>Department of Neurology, University of California, San Francisco, CA 94158, USA

21 <sup>8</sup>Department of Pharmaceutical Chemistry, University of California, San Francisco, CA 94158,  
22 USA

23 <sup>§</sup> Current affiliation: Department of Biochemistry, University of Alberta, Edmonton, AB,  
24 Canada, T6G 2H7

25

26 \*Correspondence to: [martin.kampmann@ucsf.edu](mailto:martin.kampmann@ucsf.edu)

## 27 **ABSTRACT**

28 Intercellular propagation of protein aggregation is emerging as a key mechanism in the  
29 progression of several neurodegenerative diseases, including Alzheimer’s Disease and  
30 frontotemporal dementia. However, we lack a systematic understanding of the cellular pathways  
31 controlling prion-like propagation. To uncover such pathways, we performed CRISPR  
32 interference (CRISPRi) screens in a human cell-based model of propagation of tau aggregation.  
33 Our screens uncovered that knockdown of components of the ESCRT-III machinery, namely  
34 CHMP6, or CHMP2A in combination with CHMP2B (a gene linked to familial frontotemporal  
35 dementia), promote propagation of tau aggregation. We found that knockdown of these genes  
36 caused damage to endolysosomal membranes, consistent with a role for the ESCRT pathway in  
37 endolysosomal membrane repair. Leakiness of the endolysosomal compartment significantly  
38 enhanced prion-like propagation of tau aggregation, likely by making tau seeds more available to  
39 pools of cytoplasmic tau. Together, these findings suggest that endolysosomal escape is a critical  
40 step in tau propagation.

41

42

## 43 **INTRODUCTION**

44 Neurodegenerative diseases are one of the most pressing challenges facing humanity. A  
45 formidable roadblock to the development of effective therapies is our incomplete understanding  
46 of the underlying molecular and cellular mechanisms. A major breakthrough was the discovery  
47 that scrapie, an infectious neurodegenerative disease, is caused by the cell-to-cell propagation of  
48 protein aggregates via “prion” forms of the protein (Prusiner, 1982). In this process, a prion seed  
49 converts healthy, native proteins to adopt an aggregated, prion conformer. More recently,  
50 findings from numerous, independent studies support the hypothesis that prion-like propagation  
51 also underlies common, non-infectious neurodegenerative diseases, such as Alzheimer’s Disease  
52 (AD) (recently reviewed in (Vaquer-Alicea & Diamond, 2019)). However, the mechanisms that  
53 control aggregate uptake and propagation remain to be fully elucidated, especially in those  
54 diseases that involve cytoplasmic proteins. A systematic understanding of these mechanisms is  
55 important, both for the development of therapeutics and for furthering our understanding of why  
56 specific neuronal subtypes and brain regions are especially susceptible to specific diseases.

57 Of particular interest to us are the mechanisms controlling propagation of aggregated  
58 forms of the protein tau. Tau aggregation is one of the hallmarks of AD and the levels of  
59 aggregated tau correlate with cognitive deficits and neuronal loss (Gomez-Isla et al., 1997; Berg  
60 et al., 1998; Giannakopoulos et al., 2003; Bejanin et al., 2017). Beyond AD, tau aggregation also  
61 defines a number of other neurodegenerative diseases, collectively termed tauopathies, some of  
62 which are caused by familial point mutations in tau (Wang & Mandelkow, 2016).

63 Propagation of tau aggregation can be modeled in cultured HEK293 cells that express  
64 fluorescently tagged versions of tau, as first established by the Diamond lab (Frost et al., 2009).  
65 In this system, addition of aggregated tau seeds to the culture media causes the fluorescently  
66 tagged tau in the cells to convert from a diffuse, soluble form to aggregated puncta. This cell-  
67 based model has enabled the characterization of tau species with seeding activity from patient  
68 brains (Mirbaha et al., 2015), and the creation of a minimal synthetic tau that retains seeding  
69 capability (Stöhr et al., 2017). Furthermore, cell-based models can also be used as a biosensor to  
70 detect and propagate distinct prion strains of tau from different tauopathies (Sanders et al., 2014;  
71 Kaufman et al., 2016; Woerman et al., 2016). Importantly, seeding of tau aggregation in the cell-  
72 based model is predictive of *in vivo* seeding in a mouse model (Holmes et al., 2014).

73 In addition to their utility as “biosensors” for tau aggregates with prion properties, cell-  
74 based models can also be used to elucidate cellular pathways that control propagation of tau  
75 aggregation. Previous work from others and us leveraged cell-based models to uncover  
76 mechanisms that mediate tau uptake into cells (Frost et al., 2009; Holmes et al., 2013; Rauch et  
77 al., 2018; Stopschinski et al., 2018). In those studies, binding of tau to specific cell-surface  
78 heparan sulfate proteoglycans was found to mediate cellular uptake. These results were validated  
79 in human iPSC-derived neurons and mouse brain slices (Rauch et al., 2018), supporting the  
80 physiological relevance of the cell-based model.

81 While these studies established the mechanism for tau uptake, the downstream cellular  
82 pathways controlling propagation of tau aggregation have not been systematically characterized.  
83 We hypothesized that tau aggregation in the cytosol would be influenced by multiple cellular  
84 pathways, including those controlling trafficking of tau seeds through the endolysosomal  
85 pathway, localization of tau seeds to the cytosol, templated aggregation of soluble tau, and  
86 clearance of tau aggregates (**Fig. 1A**).

87 To uncover relevant cellular pathways downstream of tau uptake, we here combine our  
88 CRISPR interference-based genetic screening approach (Gilbert et al., 2014; Kampmann, 2018)  
89 with a cell-based model of tau aggregation using fluorescence resonance energy transfer (FRET).  
90 Using this approach, we uncover endolysosomal escape of tau seeds as a critical step in the  
91 propagation of tau aggregation. Defects in the ESCRT machinery compromise endolysosomal  
92 integrity, thereby promoting the escape of tau seeds from endolysosomal compartments and  
93 accelerating subsequent templating of tau aggregation in the cytosol. These findings provide  
94 insight into the mechanisms of tau trafficking and suggest a source for new potential therapeutic  
95 targets.

96

97

## 98 **RESULTS**

99

### 100 **Cell-based model of prion-like propagation of tau aggregation**

101 We established a cell-based model to monitor the prion-like propagation of tau aggregation in  
102 HEK293T cells. Such a model had previously been pioneered by the Diamond lab (Frost et al.,  
103 2009) and adapted for flow cytometry using a FRET-based strategy to monitor tau aggregation  
104 (Kfoury et al., 2012). In this FRET-based strategy, two versions of the tau repeat domain (RD)  
105 containing disease-associated P301L and V337M mutations are expressed as fusions with either  
106 the FRET donor CFP or the FRET acceptor YFP. When exposed to tau fibrils from recombinant  
107 or cell/brain-derived lysate sources, the CFP and YFP tags are brought into close proximity,  
108 enabling FRET. We generated a reporter line following a similar strategy (**Fig. 1B**). Instead of  
109 the CFP-YFP FRET pair, we used Clover2 and mRuby2, since proteins of this type had been  
110 shown to have a very high dynamic range for FRET, with a high Förster radius (Lam et al.,  
111 2012). We selected a monoclonal line for optimal expression and dynamic range of the FRET  
112 signal.

113

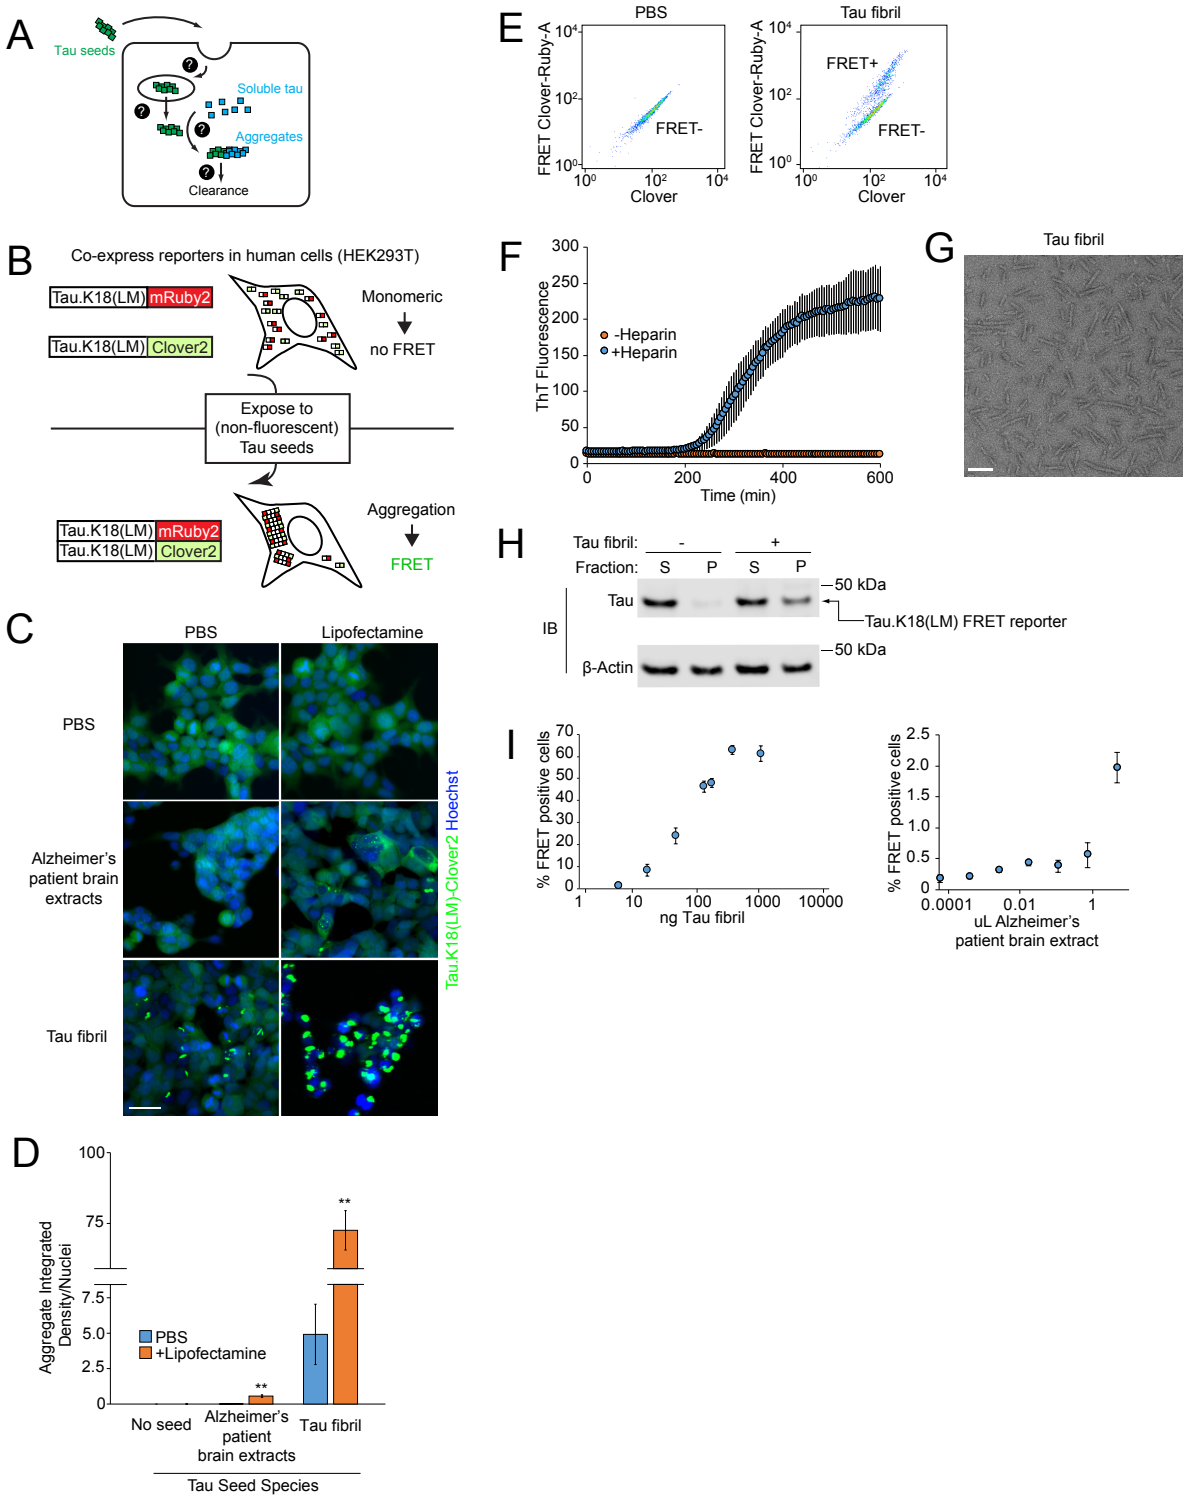

114

115 **Figure 1 – legend overleaf**

116 **Figure 1 – Tau seeds induce tau aggregation in a FRET-based reporter cell line**

117 (A) Overview of cellular processes that may control the prion-like tau propagation and aggregation.  
118 Question marks represent unknown cellular mechanisms. (B) Schematic representation of the FRET-  
119 based reporter assay to monitor tau aggregation in HEK293T cells. In the absence of tau seeds,  
120 fluorescently labeled tau.K18(LM) is monomeric. Exposure to non-fluorescent tau seeds induces  
121 aggregation of the reporter, which can be measured by the formation of tau aggregates by fluorescence  
122 microscopy or an increase in FRET intensity by flow cytometry. (C) Induction of fluorescent tau  
123 aggregates in FRET reporter cell line. Representative images of cells treated with PBS (top row),  
124 Alzheimer's patient brain extracts after 5 days (*second row*), or fibrils of recombinant human 0N4R tau  
125 after 2 days (*third row*). For each tau seed, each condition is complexed with (*right column*) or without  
126 (*left column*) lipofectamine. Nuclei were counter-stained with Hoechst 33342. Scale bar = 50  $\mu\text{m}$  (D)  
127 Comparison of intracellular fluorescent tau aggregates from images in **Fig. 1C**. Integrated density  
128 quantification of fluorescent tau aggregates seeded with various tau seeds complexed with (*blue*) or  
129 without (*orange*) lipofectamine were quantified and divided by total nuclei per image. n=3 technical  
130 replicates (with at least 50 nuclei per image), error bars represent standard deviation, \* P<0.05, \*\* P<0.01  
131 (two-tailed Student's t test for comparison to PBS (no lipofectamine) control for each tau seeding  
132 condition). (E) Representative flow cytometry plot of FRET reporter cells after 2 day treatment with PBS  
133 (*left*) or tau fibrils (*right*). (F) Incubation of recombinant 0N4R tau with heparin and constant agitation at  
134 37° C induces fibrillization. Fibrillization is monitored using an increase in Thioflavin T fluorescence (ex:  
135 440 nm, em: 485 nm), which occurs in the presence (*blue*) of heparin (10  $\mu\text{g}/\text{mL}$ ), but not in the absence  
136 (*orange*) of heparin. Error bars represent standard deviation from n=3 technical replicates. (G)  
137 Representative negative stain electron micrograph of tau fibrils. Scale bar = 100 nm (H) Lysates from  
138 FRET reporter cells treated with PBS or tau fibrils for 2 days were fractionated at 1000xg into soluble (S)  
139 or pellet (P) fractions, and subjected to SDS-PAGE and immunoblotting using antibodies against tau and  
140  $\beta$ -actin. (I) Quantification of % FRET positive cells using flow cytometry across concentration ranges of  
141 tau fibrils (*left*) or human Alzheimer's patient brain extracts (*right*). Error bars represent standard  
142 deviation for n=3 technical replicates.  
143

144 In the absence of seeding, these cells showed diffuse intracellular fluorescence without  
145 visible aggregates when monitored by fluorescence microscopy (**Fig. 1C,D**) and they appeared  
146 as a single population when FRET levels are monitored by flow cytometry (**Fig. 1E**). In contrast,  
147 exposure of these cells to extracts from AD patient brains caused the tau reporter constructs to  
148 aggregate, as reflected by formation of fluorescent puncta (**Fig. 1C,D**). However, seeded  
149 aggregation with brain-derived tau required co-incubation with lipofectamine 2000 (here referred  
150 to as lipofectamine) to achieve modest aggregation (**Fig. 1C,D**), consistent with reports from  
151 other groups (Holmes et al., 2014; Sanders et al., 2014; Woerman et al., 2016).

152 Our goal was to eliminate the use of lipofectamine, because the use of a lipocationic  
153 carrier may bypass physiologically relevant uptake or trafficking pathways. Accordingly, we  
154 purified monomeric 6xHis-tagged 0N4R human tau from *E. coli* and induced fibrillization with  
155 heparin, which we monitored by an increase in thioflavin T fluorescence (**Fig. 1F**) and by  
156 negative stain electron microscopy (**Fig. 1G**). We found that treatment of our FRET reporter  
157 cells with these tau fibrils caused robust formation of aggregates, even in the absence of

158 lipofectamine. This activity was confirmed using multiple criteria, including formation of puncta  
159 by fluorescence microscopy (**Fig. 1C,D**), appearance of a FRET-positive population by flow  
160 cytometry (**Fig. 1E**), and biochemical characterization of tau in the insoluble fraction (**Fig. 1H**).  
161 Finally, we tested the effects of increasing concentrations of tau fibrils on our FRET-based  
162 reporter. We found that 6xHis-tagged fibrils robustly triggered tau aggregation in a dose-  
163 dependent manner across nearly 2 orders of magnitude in concentration in the absence of  
164 lipofectamine, as quantified by the percentage of FRET positive cells (**Fig. 1I**). Brain lysates also  
165 produced an increase in FRET-positive cells, although the magnitude was more modest.  
166 Together, these features make our FRET-based model suitable for use in a genetic screen to  
167 identify cellular factors that control prion-like propagation of tau aggregation.

168

### 169 **Genetic screen to identify cellular factors that control prion-like propagation of tau** 170 **aggregation**

171 In order to identify cellular factors that control propagation of tau aggregation (**Fig. 1A**), we  
172 conducted a CRISPR-interference (CRISPRi)-based genetic screen (**Fig. 2A**). First, we  
173 transduced the reporter cell line described above with a lentiviral expression construct for a  
174 catalytically inactive Cas9-BFP-KRAB (dCas9-BFP-KRAB) fusion protein. dCas9-BFP-KRAB  
175 can be directed by small guide RNAs (sgRNAs) to silence a gene of interest (Gilbert et al.,  
176 2013), enabling massively parallel genetic screens in mammalian cells (Gilbert et al., 2014). We  
177 then transduced the cells with pooled sgRNA libraries that target protein homeostasis factors,  
178 which we designed specifically for this study based on the rationale that protein homeostasis  
179 factors were likely to control or modulate tau aggregation and clearance. These libraries target  
180 2,949 genes encoding genes that function in autophagy, protein folding, or the ubiquitin-  
181 proteasome system with at least five independent sgRNAs for each gene, plus 750 non-targeting  
182 control sgRNAs. Cells transduced with these libraries were exposed to recombinant tau fibrils at  
183 concentrations that would yield FRET positive cells at 50% of the maximum percentage of  
184 FRET positive cells (**Fig. 1I**), thereby maximizing the dynamic range for detecting cellular  
185 factors that either increase or decrease tau aggregation. FRET negative and FRET positive cell  
186 populations were separated by FACS, collecting sufficient numbers of cells from each  
187 population for an average 1000x representation (cells per sgRNA elements in the library).  
188 Genomic DNA was isolated and the locus encoding the sgRNAs was PCR-amplified.

189 Frequencies for each sgRNA in each population were determined by next generation sequencing.  
 190 We evaluated genes for the effect their knockdown had on the formation of tau aggregates  
 191 (Table S1) using our previously described bioinformatics pipeline (Kampmann et al., 2013;  
 192 Gilbert et al., 2014; Kampmann et al., 2014; Tian et al., 2019).

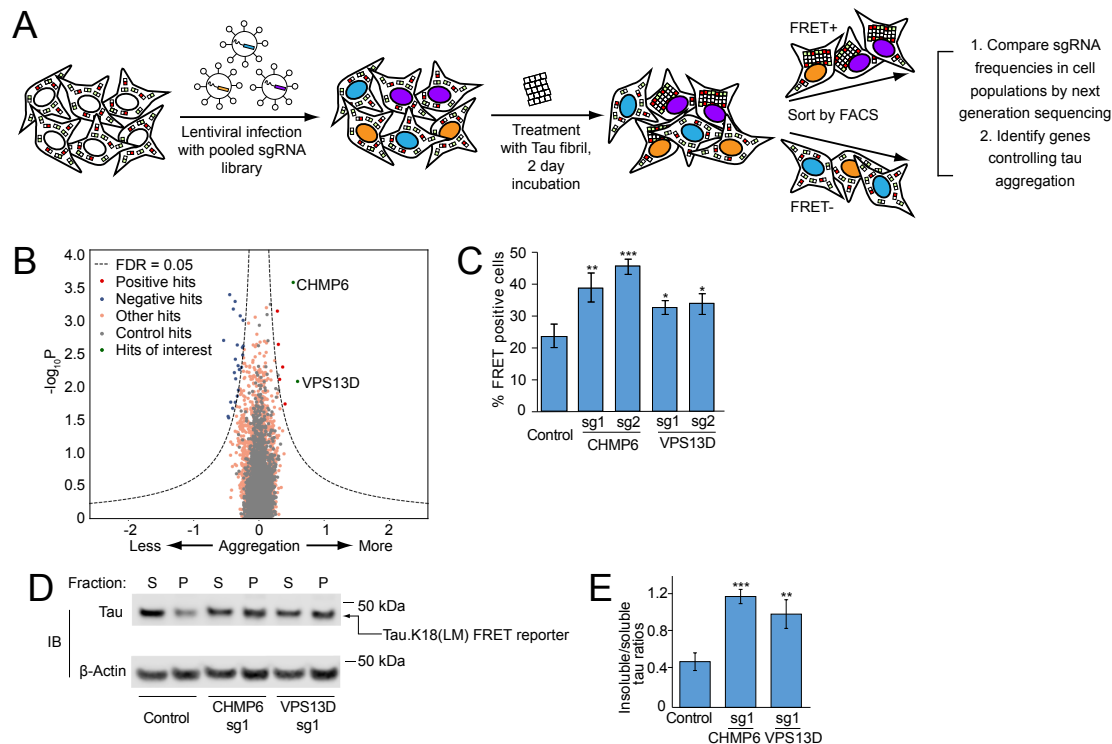

193

194 **Figure 2 – CRISPRi screen for cellular factors controlling tau aggregation**

195 (A) Strategy for pooled FRET-based CRISPRi screen. FRET reporter cells stably expressing the CRISPRi  
 196 machinery (dCas9-BFP-KRAB) were transduced with pooled lentiviral expression libraries of sgRNAs  
 197 targeting proteostasis genes. Following transduction and selection, cells were treated with tau fibrils and  
 198 incubated for 2 days. Cells were detached and sorted into FRET negative and positive populations by  
 199 Fluorescence-Activated Cell Sorting (FACS). sgRNA-encoding cassettes were amplified from genomic  
 200 DNA of the cell populations and their frequencies were quantified using next generation sequencing to  
 201 identify genes that control tau aggregation. (B) Volcano plot summarizing phenotypes and statistical  
 202 significance (by our MAGeCK-iNC pipeline, see Materials and Methods) of the genes targeted by the  
 203 sgRNA libraries. Non-targeting sgRNAs were randomly grouped into negative control “quasi-genes”  
 204 (grey dots) to derive an empirical false-discovery rate (FDR). Hit genes that passed an FDR < 0.05  
 205 threshold are shown in blue (knockdown decreases aggregation) or red (knockdown increases  
 206 aggregation), other genes are shown in orange. Two hit genes of interest are shown in green and labeled.  
 207 (C-E) Validation of hit genes CHMP6 and VPS13D. FRET reporter cells transduced with individual  
 208 sgRNAs targeting two hit genes or a non-targeting control sgRNA, and 5 days after transduction treated  
 209 for 2 days with tau fibrils. (C) % of FRET positive cells was quantified by flow cytometry. Error bars  
 210 represent standard deviation of n=3 technical replicates. \*P<0.05, \*\*P<0.01, \*\*\*P<0.001 (two-tailed  
 211 Student’s t test for comparison to the non-targeting control sgRNA). (D) Representative immunoblot for  
 212 the tau-fluorescent protein construct in the soluble and insoluble fractions as in Fig. 1H. (E)  
 213 Quantification of insoluble/soluble tau ratios from immunoblots in Fig 2D. Error bars represent standard  
 214 deviation for n=3 biological replicates. P<0.05, \*\*P<0.01, \*\*\*P<0.001 (two-tailed Student’s t test for  
 215 comparison to the non-targeting control sgRNA).



216  
217  
218  
219  
220  
221  
222  
223  
224  
225  
226  
227  
228  
229  
230  
231  
232  
233  
234  
235  
236  
237  
238  
239  
240  
241  
242  
243  
244  
245

Two genes stood out for the strong enhancement of tau aggregation by their knockdown: CHMP6 and VPS13D (**Fig. 2B**). We decided to prioritize these two genes for further characterization, since both are related to genes implicated in neurodegenerative diseases.

CHMP6 is part of the Endosomal Sorting Complex Required for Transport (ESCRT)-III complex, which is required for numerous cellular processes involving membrane remodeling (Hurley, 2015). Mutations in the ESCRT-III component CHMP2B cause familial frontotemporal lobar dementia (FTD) and have been shown to cause endolysosomal defects (Urwin et al., 2010; Clayton et al., 2015).

The *VPS13* protein family is comprised of four closely-related proteins, *VPS13A-D* (Velayos-Baeza et al., 2004). VPS13 family proteins are localized at various inter-organelle membrane contact sites and facilitates non-vesicular lipid transport (Kumar et al., 2018; Yeshaw et al., 2019). Interestingly, mutations *VPS13D* are associated with recessive ataxia (Seong et al., 2018). Previously, *VPS13A* and *VPS13C* mutations have been associated with a Huntington's-like syndrome (Chorea-Acanthocytosis) (Rampoldi et al., 2001; Ueno et al., 2001) and Parkinson's disease (Lesage et al., 2016), respectively.

To confirm these screening hits, we cloned 2 individual sgRNAs each targeting CHMP6 and VPS13D, and confirmed target knockdown by qPCR (**Table S2**). Using these sgRNAs, we validated the effect of CHMP6 and VPS13D knockdown on tau aggregation by flow cytometry (**Fig. 2C**) and biochemical solubility assay (**Fig. 2D, E**).

### **CHMP6 knockdown accelerates tau aggregation following tau seed uptake**

We next investigated the mechanism by which knockdown of CHMP6 and VPS13D might affect tau aggregation. First, we excluded the possibility that knockdown of these genes alters the levels of our tau reporter (**Fig. 3A**). Since we previously identified factors controlling cellular uptake of tau (Rauch et al., 2018), we tested whether knockdown of CHMP6 and VPS13D impacted the uptake of tau fibrils. However, we found that knockdown of the genes did not impact tau fibril uptake (**Fig. 3B**), suggesting that their impact on tau aggregation is mediated downstream of seed uptake.

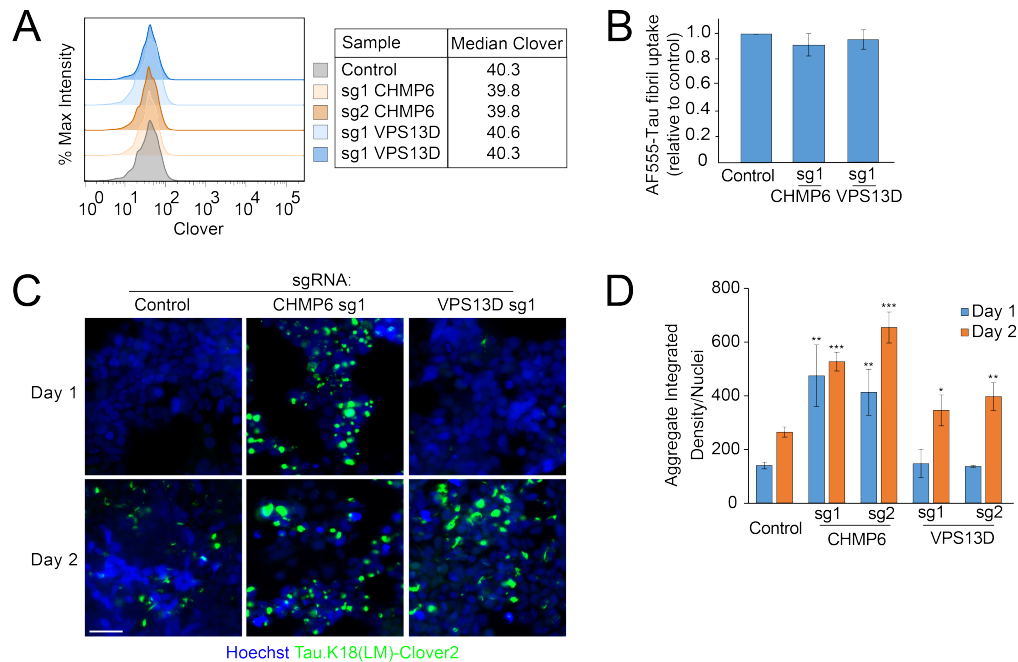

246

247 **Figure 3 – CHMP6 knockdown accelerates the prion-like propagation of tau aggregation**

248 FRET reporter cells or CRISPRi-HEK293T cells were transduced with individual sgRNAs targeting  
 249 CHMP6 or VPS13D, or a non-targeting control sgRNA, and characterized for different phenotypes 5 days  
 250 after transduction (A) Knockdown of CHMP6 and VPS13D does not impact steady state levels of the tau-  
 251 Clover2 construct in FRET reporter cells, as quantified by flow cytometry. (B) Individual gene  
 252 knockdown does not impact uptake of tau fibrils. CRISPRi HEK293T cells were incubated with AF555-  
 253 labeled tau fibrils for 1 hour at 37° C, stringently washed and red fluorescence representing internalized  
 254 tau fibrils was quantified by flow cytometry. Bar graph shows normalized fluorescence intensities and  
 255 standard deviation of n=3 technical replicates. (C) CHMP6 knockdown accelerates prion-like propagation  
 256 of tau aggregation. Representative fluorescence micrographs of the Tau.K18(LM)Clover2 reporter in cells  
 257 1 and 2 days after fibril addition. Nuclei were counter-stained with Hoechst 33342. Scale bar = 50 μm (D)  
 258 Quantification of Fig. 3C. Tau aggregates were quantified by integrated density across the entire image  
 259 and divided by total nuclei per image. Error bars represent standard deviation where n=3 images per  
 260 condition (with at least 50 nuclei per image). \*P<0.05, \*\*P<0.01, \*\*\*P<0.001 (two-tailed Student's t test  
 261 for comparison to the values for non-targeting control sgRNA of the same day).  
 262

263 We next sought to evaluate whether knockdown of CHMP6 and VPS13D increased the  
 264 rate of tau aggregation, or decreased the rate of tau aggregate clearance. To this end, we utilized  
 265 high-content imaging analysis to track the fibril-induced aggregation of tau over time. As  
 266 expected from the results in our primary screen, we observed increased levels of aggregates 48  
 267 hours post seeding with fibrils when either CHMP6 or VPS13D were knocked down (Fig.  
 268 3C,D). Intriguingly, the timeline of tau aggregate formation was differentially affected by the  
 269 two gene knockdowns. While VPS13D knockdown did not cause a statistically significant  
 270 increase in aggregates 24 hours after treatment with tau fibrils compared to a non-targeting

271 control sgRNA, CHMP6 knockdown promoted early aggregation 24 hours post seeding (**Fig.**  
272 **3C,D**). Interestingly, aggregate formation from 24 to 48 hours post-seeding did not change  
273 substantially with CHMP6 knockdown, suggesting that the majority of soluble tau rapidly  
274 aggregates following treatment with tau fibrils in that background. Given the intriguing  
275 acceleration of tau aggregation by CHMP6, and the comparatively weaker phenotype of  
276 VPS13D, we decided to focus our mechanistic studies on CHMP6.

277

### 278 **Endolysosomal escape of tau seeds is rate limiting for propagation of tau aggregation**

279 To investigate the mechanism by which CHMP6 knockdown accelerates seeded tau aggregation,  
280 we monitored fibril entry and aggregate formation simultaneously by longitudinal imaging in  
281 cells with CHMP6 knockdown compared to cells expressing a non-targeting control sgRNA.  
282 (**Fig. 4A, Supplementary Movie 1 and 2**). In CHMP6 knockdown cells, large tau aggregates  
283 rapidly formed soon after tau fibrils localized to cells, within 12 hours post seeding. In control  
284 cells, by contrast, tau fibrils localized to control cells long before aggregates form. We confirmed  
285 that these fibril puncta partially colocalize with the late-endosome/lysosome markers RAB7A  
286 and LAMP1, and frequently localize to the lumen of RAB7A/LAMP1 positive compartments  
287 (**Fig 4B, Supplementary Movie 3 and 4**). These results suggest that fibrils normally accumulate  
288 in endolysosomal compartments, where they do not encounter cytosolic tau. However, CHMP6  
289 knockdown seems to accelerate exit of fibrils from the endolysosomal pathway into the cytosol,  
290 where it can then seed aggregation of cytosolic tau.

291 A mechanism underlying this CHMP6 phenotype is suggested by the recently reported  
292 role of the ESCRT machinery in the repair of endolysosomal membrane damage (Skowyra et al.,  
293 2018). We hypothesized that knocking down CHMP6 may compromise ESCRT-mediated  
294 membrane repair and facilitate tau fibril escape from damaged endolysosomes. We tested this  
295 hypothesis by monitoring the formation endolysosomal damage using a cytosolic GFP fusion of  
296 galectin 3 (GAL3), a lectin that binds  $\beta$ -galactosides and forms puncta when these sugars are  
297 exposed on damaged endolysosomes (Aits et al., 2015). Knocking down CHMP6 indeed caused  
298 GAL3-GFP puncta, revealing endolysosomal damage (**Fig. 4C,D**). This demonstrates that  
299 CHMP6 plays a critical role in the maintenance of endolysosomal integrity.

300

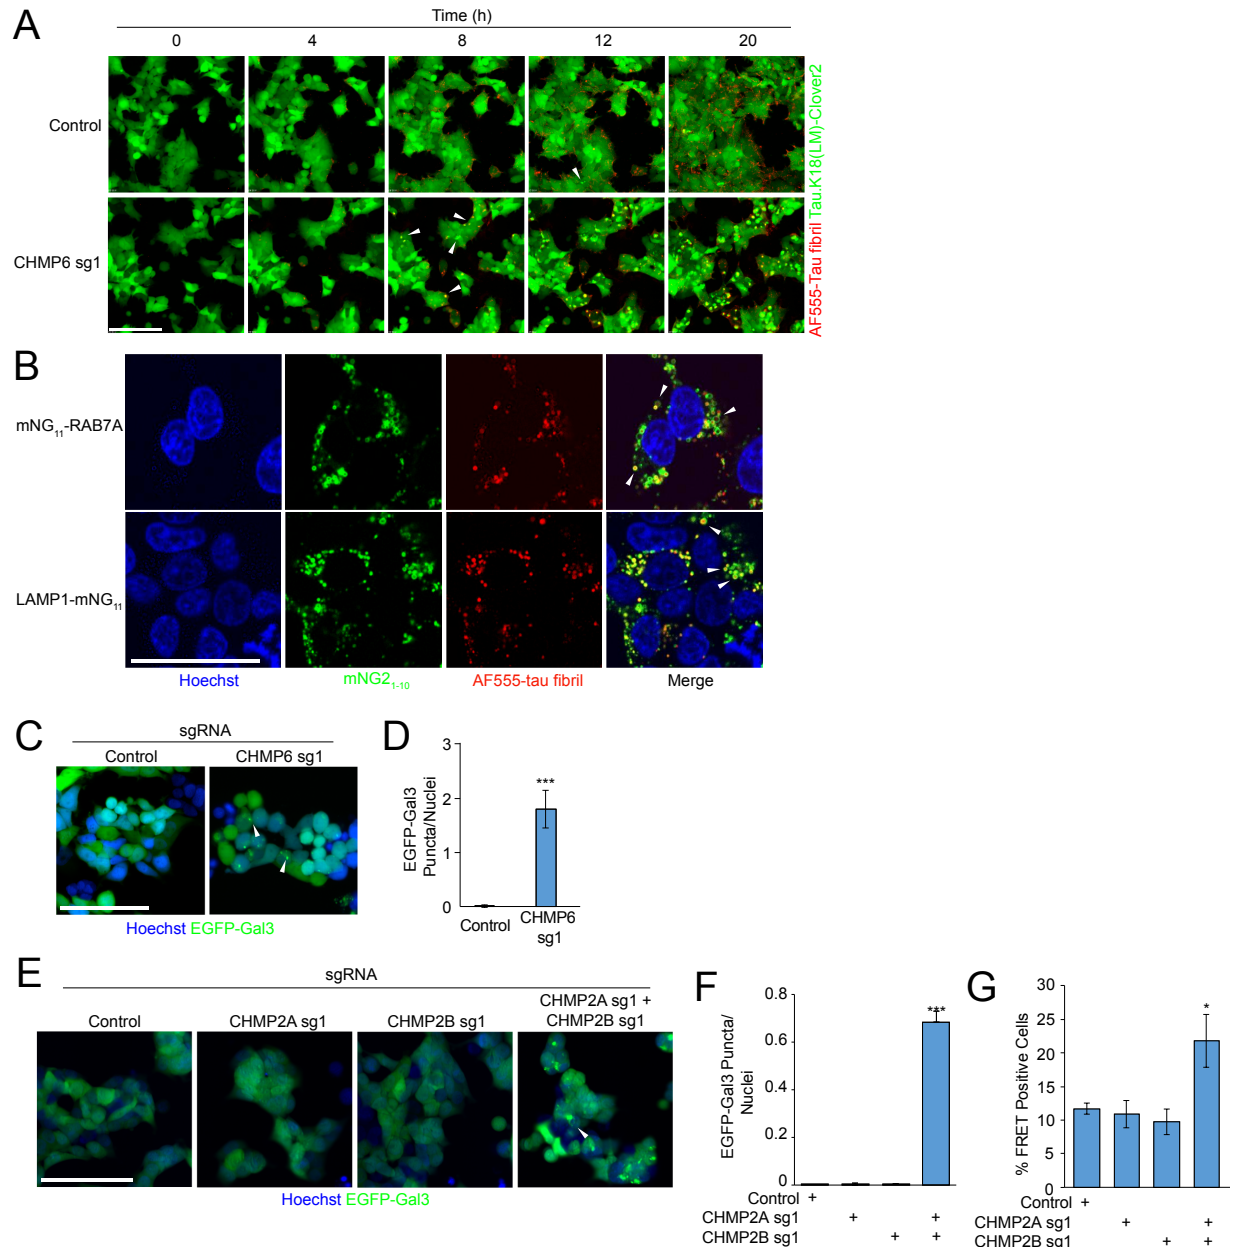

301

302 **Figure 4 – CHMP6 knockdown compromises endolysosomal membrane integrity**

303 (A) Time-lapse microscopy of cell entry of tau-AF555 fibrils and resulting aggregation of the cytosolic  
 304 tau-Clover2 construct. Representative images of CRISPRi-HEK293T cells expressing tau.K18(LM)-  
 305 clover2 transduced with either non-targeting control (top) or *CHMP6*-targeting sgRNA (bottom) are  
 306 shown. Scale bar = 50  $\mu$ m. Corresponding movies are provided as Supplementary Movies 1 (control  
 307 sgRNA) and 2 (*CHMP6* sgRNA). (B) Representative fluorescence microscopy images of HEK293T cells  
 308 with RAB7A or LAMP1 markers endogenously labeled with the split-mNeonGreen system treated with  
 309 AF555-tau fibrils for 22 hours. AF555-tau fibrils form puncta that partially co-localize with RAB7A and  
 310 LAMP1-marked endocytic compartments, and in some cases localize to the inner lumen of RAB7A and  
 311 LAMP1-positive compartments (white arrowheads). Scale bar = 50  $\mu$ m. Corresponding movies are  
 312 provided as Supplementary Movies 3 (mNG<sub>11</sub>-RAB7A) or 4 (LAMP1-mNG<sub>11</sub>) (C) *CHMP6* knockdown  
 313 causes endolysosomal vesicle damage. Representative fluorescence microscopy images of CRISPRi-  
 314 HEK293T cells expressing an EGFP-Galectin3 (EGFP-Gal3) reporter transduced with either control (*left*)

315 or CHMP6 (*right*) sgRNA. Nuclei were counter-stained with Hoechst 33342. **(D)** Quantification of  
316 EGFP-Gal3 puncta divided by number of nuclei in fluorescence microscopy images shown in **Fig 4C**.  
317 Error bars represent standard deviation for n=3 technical replicates (with at least 50 nuclei per image).  
318 \*\*\*P<0.001 (two-tailed Student's t test for comparison to the non-targeting control sgRNA). **(E)**  
319 Simultaneous, but not individual, knockdown of CHMP2A and CHMP2B results in endolysosomal  
320 damage, monitored as in Fig. 4C. Nuclei were counter-stained with Hoechst 33342. Scale bar = 50  $\mu$ m **(F)**  
321 Quantification of EGFP-Gal3 puncta divided by nuclei in fluorescence microscopy images shown in **Fig**  
322 **4E**. Error bars represent standard deviation for n=3 technical replicates (with at least 50 nuclei per  
323 image). \*\*\*P<0.001 (two-tailed Student's t test for comparison to the non-targeting control sgRNA). **(G)**  
324 Simultaneous, but not individual, knockdown of CHMP2A and CHMP2B increases prion-like tau  
325 aggregation. % FRET positive reporter cells transduced with sgRNAs as indicated 2 days after tau fibril  
326 treatment. Error bars represent standard deviation where n=3 technical replicates. \*P<0.05 (two-tailed  
327 Student's t test for comparison to the non-targeting control sgRNA).  
328

329 CHMP6 was the only ESCRT protein that was a strong hit in our primary CRISPRi  
330 screen. However, other ESCRT proteins have several paralogues in the human genome, so we  
331 hypothesized that these paralogues may have been false-negatives in the CRISPRi screen  
332 because they have partially redundant functions. To test this hypothesis, we targeted CHMP2B, a  
333 gene with disease-associated mutations involved in familial frontotemporal lobar dementia  
334 (FTD). We hypothesized that its phenotype might have been masked by its close homolog,  
335 CHMP2A, which could partially compensate for a loss in CHMP2B function. Indeed, we found  
336 that simultaneous, but not individual, knockdown of CHMP2A and CHMP2B generated GAL3  
337 puncta indicative of endolysosomal damage (**Fig. 4E,F**) and likewise promoted prion-like  
338 propagation of tau aggregation (**Fig. 4G**). This finding supports our hypothesis that maintenance  
339 of endolysosomal membrane integrity by the broader ESCRT-machinery counteracts  
340 endolysosomal escape of tau seeds.

341 A key implication of this model is that endolysosomal damage may promote the prion-  
342 like propagation of tau aggregation. To test this concept, we treated cells with Leucyl-Leucyl-o-  
343 Methyl-ester (LLOME), a lysosomotropic compound that accumulates in acidified organelles  
344 and rapidly forms membranolytic polymers after cleavage by cathepsin C (Thiele & Lipsky,  
345 1990; Maejima et al., 2013; Skowyra et al., 2018). We confirmed that LLOME damages  
346 endolysosomal membranes in our cell line using the GAL3-GFP reporter (**Fig. 5A,B**).  
347 Interestingly, LLOME phenocopied CHMP6 knockdown in its acceleration of seeded tau  
348 aggregation only at concentrations where we observe endolysosomal membrane damage (**Fig.**  
349 **5C**).  
350

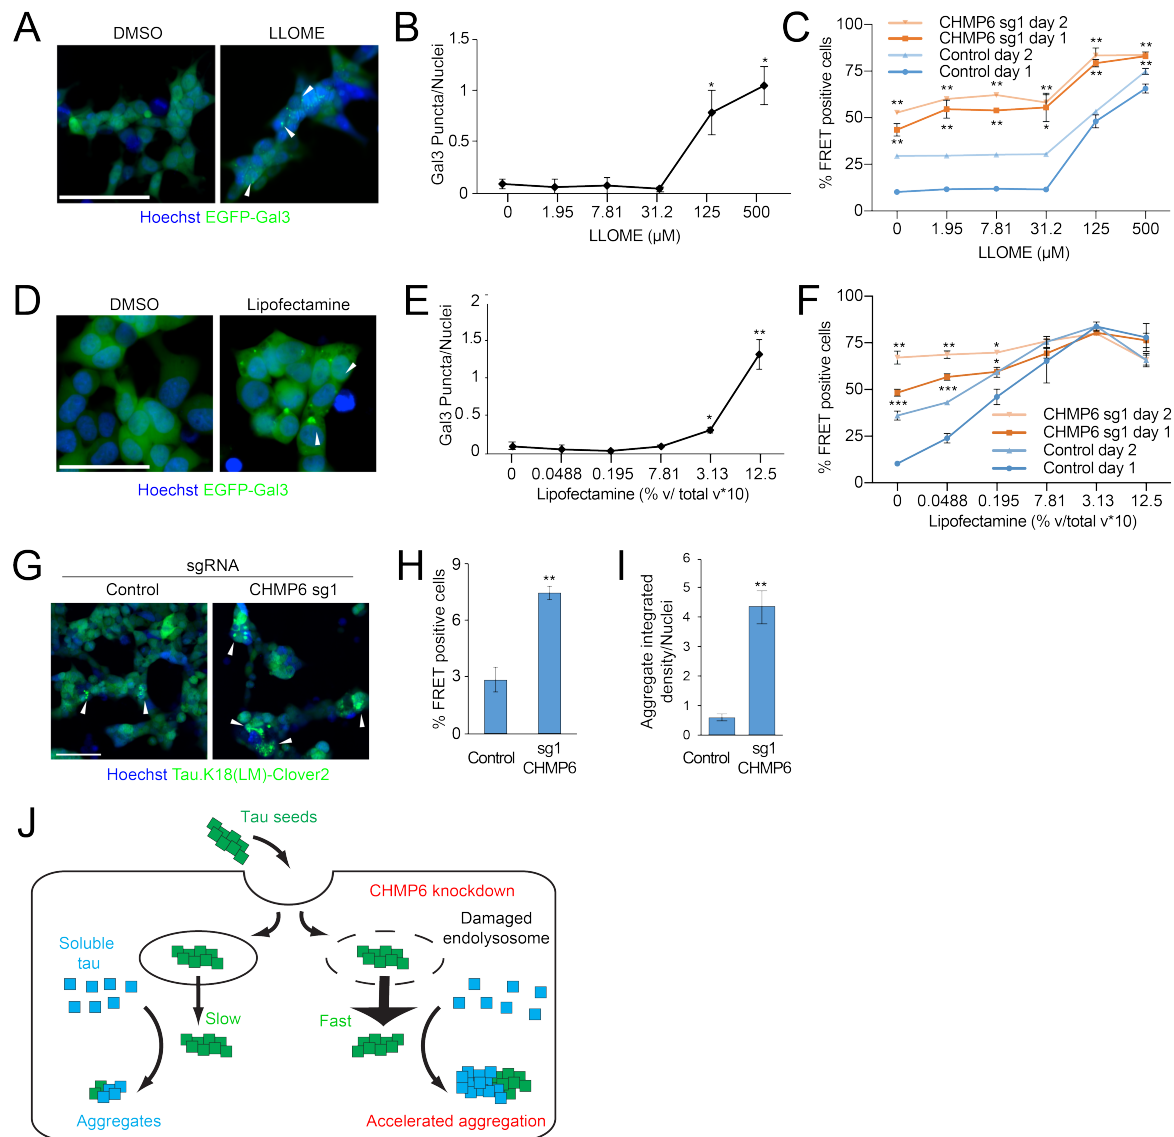

351

352 **Figure 5 – Small molecules damage endolysosomal compartments and phenocopy the acceleration**  
 353 **of the prion-like propagation of tau aggregation following CHMP6 knockdown**

354 (A) Treatment with the lysosomotropic drug leucyl-leucyl-O-methyl-ester (LLOME) damages  
 355 endolysosomal vesicles. Representative fluorescence microscopy images of CRISPRi-HEK293T cells  
 356 expressing the EGFP-Gal3 reporter treated with DMSO (left) or 500  $\mu\text{M}$  LLOME (right) for 24 h. Scale  
 357 bar = 50  $\mu\text{m}$  (B) Quantification of EGFP-Gal3 puncta divided by number of nuclei in fluorescence  
 358 microscopy images shown in **Fig 5A**. Error bars represent standard deviation for n=3 technical replicates  
 359 (with at least 50 nuclei per image). \*\*\*P<0.001 (two-tailed Student's t test for comparison to DMSO  
 360 control). (C) LLOME treatment accelerates the prion-like propagation of tau aggregation. % FRET  
 361 positive cells transduced with control (blue) or CHMP6 sgRNA (orange) were analyzed 24 (dark line) or  
 362 48 (light line) hours following co-treatment with DMSO or increasing concentrations of LLOME and tau  
 363 fibrils. Error bars represent standard deviation for n=3 technical replicates. \*P<0.05, \*\*P<0.01 (two-tailed  
 364 Student's t test for comparison to the values for non-targeting control sgRNA of the same day) (D)  
 365 Lipofectamine treatment damages endolysosomal vesicles. Representative fluorescence microscopy  
 366 images of CRISPRi-HEK293T cells expressing the EGFP-Gal3 reporter treated with DMSO (left) or 1.25  
 367 % v/v Lipofectamine 2000 (right) for 6 h. Scale bar = 50  $\mu\text{m}$  (E) Quantification of EGFP-Gal3 puncta  
 368 divided by number of nuclei in fluorescence microscopy images shown in **Fig 5D**. Error bars represent

369 standard deviation for n=3 technical replicates. \*\*\*P<0.001 (two-tailed Student's t test for comparison to  
370 no lipofectamine treatment). (F) Lipofectamine treatment accelerates the prion-like propagation of tau  
371 aggregation. % FRET positive cells transduced with control (*blue*) or CHMP6 sgRNA (*orange*) were  
372 analyzed 24 (*dark line*) or 48 (*light line*) hours following co-treatment with PBS or increasing  
373 concentrations of lipofectamine 2000 and tau fibrils. Error bars represent standard deviation where n=3  
374 technical replicates. \*P<0.05, \*\*P<0.01, \*\*\*P<0.001 (two-tailed Student's t test for comparison to the  
375 values for non-targeting control sgRNA of the same day) (G-I) CHMP6 knockdown increases the prion-  
376 like propagation tau aggregation when seeding with Alzheimer's patient brain extracts. (G)  
377 Representative images of FRET reporter cells transduced with control (*left*) or CHMP6 sgRNA (*right*)  
378 and treated with Alzheimer's patient brain extract after 5 days (H) Quantification of images in **Fig. 5G**.  
379 Tau aggregates were quantified by integrated density across the entire image and divided by total nuclei  
380 per image. Error bars represent standard deviation for n=3 images per condition (with at least 50 nuclei  
381 per image). \*\*P<0.01 (two-tailed Student's t test for comparison to non-targeting control sgRNA) (I) %  
382 FRET positive cells 5 days following treatment with Alzheimer's patient brain extract. Error bars  
383 represent standard deviation where n=3 technical replicates. \*\*P<0.01 (two-tailed Student's t test for  
384 comparison to non-targeting control sgRNA). (J) Model.

385  
386

387 As mentioned above, lipocationic reagents, such as Lipofectamine, are frequently used to  
388 deliver tau aggregates to cells for in vitro studies of prion-like propagation (Nonaka et al., 2010;  
389 Holmes et al., 2014; Woerman et al., 2016). Interestingly, these agents have previously been  
390 demonstrated to induce endolysosomal damage (Zhou & Huang, 1994). Thus, lipocationic agents  
391 might facilitate cargo delivery and escape, in part, by causing endolysosomal membrane damage.  
392 Indeed, we found that GAL3 puncta indicative of endolysosomal damage are visible 24 hours  
393 after treating cells with Lipofectamine (**Fig. 5D,E**). Moreover, pre-treatment with lipofectamine  
394 6 hours prior to seeding cells with tau fibrils significantly increased the formation of tau  
395 aggregates in a concentration-dependent manner, including at concentrations lower than the  
396 threshold required to induce a Gal3 reporter response (**Fig. 5F**). This suggests that lipofectamine  
397 may assist in the prion-like spread of tau aggregates both by acting as a delivery vehicle and  
398 damaging endolysosomal membranes.

399 When we combined CHMP6 knockdown with either LLOME or lipofectamine treatment,  
400 we found that the relative impact of CHMP6 knockdown on tau aggregate seeding was  
401 diminished in the presence of LLOME (**Fig. 5C**) or lipofectamine (**Fig. 5F**), supporting the idea  
402 that CHMP6 knockdown and LLOME/lipofectamine treatment promote propagation of tau  
403 aggregation at least partially via the same mechanism.

404 Finally, we wanted to validate the CHMP6 phenotype using tau seeds derived from  
405 Alzheimer's patient brain-derived extracts. Indeed, we found that CHMP6 knockdown increased  
406 the rate of tau aggregation in our reporter line seeded with patient brain-derived tau by both

407 microscopy (**Fig. 5G,H**) and flow cytometry (**Fig. 5I**). Taken together, our results support  
408 endolysosomal escape of tau seeds as a rate-limiting step in our cell-based model of prion-like  
409 tau propagation. Propagation can be accelerated by compromising endolysosomal integrity either  
410 by directly damaging endolysosomes or by interfering with their repair through the ESCRT  
411 machinery (**Fig. 5J**).

412

413

## 414 **DISCUSSION**

415 Using our CRISPRi-based genetic screening platform in a cell-based model of prion-like  
416 propagation of tau aggregation, we found that defects in the ESCRT machinery compromise the  
417 integrity of the endolysosomal pathway and thereby promote endolysosomal escape of tau seeds  
418 and accelerated propagation of tau aggregation. While our observations were made in a cell-  
419 based model, it is intriguing to speculate that they are relevant for propagation of tau aggregation  
420 in the context of neurodegenerative diseases. Indeed, endolysosomal changes are among the first  
421 cellular symptoms in Alzheimer's Disease (Cataldo et al., 2000), and have been postulated to be  
422 a central driver of pathogenesis in many neurodegenerative diseases (Hu et al., 2015; Schreij et  
423 al., 2016; Small et al., 2017). Furthermore, several risk genes for neurodegenerative diseases are  
424 thought to function in the endolysosomal pathway, including CHMP2B (Skibinski et al., 2005).

425 While the ESCRT-III subunit CHMP6 was a top hit in our genetic screen, CHMP2B  
426 knockdown by itself did not have a major impact on endolysosomal integrity and the propagation  
427 of tau aggregation. This was likely the case because human cells express CHMP2A, a paralogue  
428 of CHMP2B which can mostly compensate for CHMP2B in our cell-based model – combined  
429 knockdown of CHMP2A and CHMP2B phenocopied CHMP6 knockdown. CHMP6 does not  
430 have a paralogue in mammalian cells and is an essential gene, whereas CHMP2B is non-  
431 essential, based on the Cancer dependency map, depmap.org (Tsherniak et al., 2017), and  
432 knockout mouse phenotypes (Bult et al., 2019). This provides a rationale for CHMP6 deficiency  
433 not being associated with neurodegenerative diseases – it may not be compatible with life.  
434 CHMP2B deficiency can be expected to cause a milder phenotype that is unmasked only later in  
435 life.

436 Many mechanisms have been proposed to explain the toxicity of tau aggregates.  
437 Intriguingly, tau aggregates can damage membranes in vitro (Ait-Bouziad et al., 2017), and may



438 damage the endolysosomal pathway in patient neurons. In combination with our findings, such a  
439 mechanism of toxicity would predict a “vicious circle” or positive-feedback loop, in which tau  
440 aggregates would damage the endolysosomal pathway, thereby promoting their own propagation.  
441 They could also promote spreading of other aggregates, compatible with the co-occurrence of  
442 different protein pathologies, such as tau and a-synuclein, in many cases of neurodegenerative  
443 disease (Yan et al., 2018).

444 In summary, our results further support the concept that therapeutic strategies aimed at  
445 maintaining or restoring the function of the endolysosomal pathway or promoting its repair may  
446 be promising in neurodegenerative diseases. Future studies will be aimed at understanding  
447 mechanisms underlying the VPS13D phenotype, which seems distinct from the endolysosomal  
448 escape pathway controlled by CHMP6.

449 While our genetic screen with libraries targeting protein homeostasis factors  
450 unexpectedly uncovered the ESCRT machinery in counter-acting endolysosomal escape of tau,  
451 we had expected to find molecular chaperones or co-chaperones controlling tau aggregation  
452 among the top hits. Results obtained *in vitro* (Voss et al., 2012; Baughman et al., 2018; Kundel et  
453 al., 2018; Mok et al., 2018) and *in vivo* (Abisambra et al., 2010) suggest that specific chaperones  
454 and co-chaperones can strongly modulate tau aggregation, and are potential therapeutic targets  
455 for tauopathies (Young et al., 2018). The fact that knockdown of individual chaperones did not  
456 have a major impact on tau aggregation could be due to redundancy in the chaperone network of  
457 cells. Future CRISPR activation (CRISPRa) screens have the potential to yield complementary  
458 results by over-expressing endogenous genes (Gilbert et al., 2014; Kampmann, 2018) and may  
459 reveal relevant chaperones in the cellular context.

460 Finally, future screens in iPSC-derived neurons using our recently developed platform  
461 (Tian et al., 2019) may reveal additional, neuron-specific pathways, and also uncover factors that  
462 underlie selective vulnerability of specific neuronal subtypes (Kampmann, 2017).

463

464

465

## 466 MATERIALS AND METHODS

467

### 468 Preparation of extracts from Alzheimer's Disease patient brains

469 The Alzheimer's Disease brain sample was received from the Neurodegenerative Brain Bank of  
470 the UCSF Memory and Aging Center (UCSF/MAC) . All research participants at UCSF/MAC  
471 undergo longitudinal clinical and imaging assessment. Upon death, the fresh brain was slabbed  
472 into 8- to 10-mm thick coronal slabs upon procurement. These slabs were alternately fixed, in 10%  
473 neutral buffered formalin for 72 hours, or snap frozen. Twenty-six tissue blocks covering  
474 dementia-related regions of interest were dissected from the fixed slabs, and hematoxylin and  
475 eosin and immunohistochemical stains were applied following standard diagnostic procedures  
476 developed for patients with dementia (Hyman & Trojanowski, 1997; Tartaglia et al., 2010).  
477 Immunohistochemistry was performed using antibodies against TDP-43 (rabbit, 1:2000,  
478 Proteintech Group, Chicago, IL, USA), hyperphosphorylated tau (CP-13, S202/T205, mouse,  
479 1:250, courtesy of P. Davies), beta-amyloid (1-16, mouse, clone DE2, 1:500, Millipore, Billerica,  
480 MA, USA), alpha-synuclein (LB509, mouse, 1:5000, courtesy of J. Trojanowski and V. Lee). All  
481 immunohistochemical runs included positive control sections to exclude technical factors as a  
482 cause of absent immunoreactivity. Neuropathological diagnosis followed currently accepted  
483 guidelines (Hauw et al., 1994; Dickson et al., 2002; McKeith et al., 2005; Cairns et al., 2007;  
484 Montine et al., 2012). For this study, a region from the parietal cortex containing high amount of  
485 AD-tau pathology was sampled from a snap frozen block. A brain extract was prepared and  
486 phosphotungstate-insoluble fractions were purified as previously described (Woerman et al.,  
487 2016). The extract was diluted in PBS 1:40 in DPBS and flash frozen in liquid nitrogen and  
488 stored at -80 °C.

489

### 490 Purification, characterization, labeling, and fibrillization of recombinant tau

491 Human WT 0N4R-6xHis tau protein was expressed in Rosetta<sup>TM</sup> 2(DE3) competent cells  
492 (MilliporeSigma #71400-3) essentially as previously described (Mok et al., 2018). Briefly,  
493 protein expression was induced with 200 µM IPTG for 3.5 hours at 30 °C. Cells were lysed via a  
494 microfluidizer (Microfluidics Cat# M-100EH) followed by boiling of the lysate for 20 min. The  
495 clarified supernatant was subsequently dialyzed overnight into Buffer A (20 mM MES pH 6.8,  
496 50 mM NaCl, 1mM EGTA, 1 mM MgCl<sub>2</sub>, 2 mM DTT, 0.1 mM PMSF) and purified by cation

497 exchange using a HiTrap Cpto SP ImpRes column (GE Cat# 17546851) with elution buffer  
498 (Buffer A with 1 M NaCl). Fractions containing tau as determined by Coomassie-stained SDS-  
499 PAGE were dialyzed into PBS, concentrated with an Amicon Ultra-15 centrifugal 3 kDa MWCO  
500 filter (Millipore Cat# UFC900324), endotoxin purified using a Pierce high capacity endotoxin  
501 removal spin column (ThermoFisher Cat# 88274), filter sterilized using a Millex-GV syringe  
502 filter unit (Millipore Cat# SLGV033RB), and snap frozen in PBS at -80 °C. Aggregation was  
503 induced by incubating 10  $\mu$ M tau (0.43 mg/mL) with .022 mg/mL heparin (Fisher Cat# 9041-08-  
504 1, lot# 177772) and shaken at 37 °C overnight in a shaker at 1200 rpm (VWR Cat#12620-942).

505 To generate fluorescently labeled tau fibrils, 0.6  $\mu$ l 10 mg/mL Alexa Fluor-555  
506 (ThermoFisher Cat# A37571), 180  $\mu$ l of 0.43 mg/mL tau fibrils, and 19.4  $\mu$ l 1M sodium  
507 bicarbonate were mixed at room temperature in the dark for 1h. Labeled tau fibrils were  
508 subsequently purified from unlabeled dye with using a Zeba 7k MWCO spin desalting column  
509 (ThermoFisher Cat# 89882).

510 Tau fibrils were negatively stained with 0.75% uranyl formate (pH 5.5-6.0) on thin  
511 amorphous carbon layered 400-mesh copper grids (Pelco Cat# 1GC400). Five  $\mu$ L of sample was  
512 applied to the grid for 20s before taking the droplet off with Whatman paper, followed by two  
513 washes with 5  $\mu$ L ddH<sub>2</sub>O and three applications of 5  $\mu$ L uranyl formate removed by vacuum.  
514 Grids were imaged at room temperature using a Fei Tecnai 12 microscope operating at 120kV.  
515 Images were acquired on a US 4000 CCD camera at 66873x resulting in a sampling of 2.21  
516 Angstrom/pixel.

517

## 518 **Plasmid and library design and construction**

519 Plasmids for the FRET-based aggregation reporter were constructed by cloning a fusion of the  
520 K18 repeat domain of tau containing the P301L/V337M mutation (Kfoury et al., 2012) in frame  
521 with C-terminal Clover2 (Addgene #54711) or mRuby2 (Addgene #54768, (Lam et al., 2012),  
522 gifts from Michael Davidson, into the lentiviral expression vector pMK1200 (Kampmann et al.,  
523 2013), Addgene #84219) under the control of the constitutive EF1A promoter, to obtain  
524 pMK1253 or pMK1254, respectively.

525 Pooled CRISPRi sgRNA libraries targeting human protein homeostasis genes were  
526 designed using our next-generation algorithm (Horlbeck et al., 2016). SgRNA protospacers for  
527 these libraries are listed in Table S2. Oligonucleotide pools encoding the library were

528 synthesized by Agilent, PCR amplified and cloned into our optimized lentiviral sgRNA  
529 expression vector as previously described (Gilbert et al., 2014).

530 For generation of individual sgRNAs, pairs of oligonucleotides (IDT) were annealed and  
531 ligated into our optimized lentiviral sgRNA expression vector. For double sgRNA expression  
532 constructs, CHMP2B and CHMP2A targeting oligos were annealed and ligated into pMJ114 and  
533 pMJ179, and a double-sgRNA vector was generated from these as previously described  
534 (Adamson et al., 2016).

535 The fluorescent Gal3 reporter was PCR amplified from pEGFP-hGal3 (Addgene  
536 #73080), a gift from Tamotsu Yoshimori) and Gibson cloned into pJC41, which uses the  
537 pMK1200 backbone (described above) and replaces the EF1a promoter with a CAG promoter.

538

### 539 **Cell culture, cell line generation, and treatment conditions**

540 All cells were maintained in a tissue culture incubator (37 °C, 5% CO<sub>2</sub>) and checked regularly for  
541 mycoplasma contamination. HEK293T cells were cultured in DMEM supplemented with 10%  
542 fetal bovine serum (Seradigm Cat# 97068-085, Lot# 076B16), Pen/Strep (Life Cat# 15140122),  
543 and L-glutamine (Life Cat# 25030081).

544 To generate the FRET reporter line, HEK293T cells were infected with lentivirus from  
545 plasmids pMK1253 and pMK1254 and cells with the highest dynamic FRET signal 2 days after  
546 seeding with tau fibrils were selected. To introduce CRISPRi functionality, the cells were  
547 lentivirally transduced with pHR-SFFV-dCas9-BFP-KRAB (Addgene # 46911, a gift from  
548 Stanley Qi & Jonathan Weissman (Gilbert et al., 2013)), mono-clonal cell lines were selected  
549 and CRISPRi activity was validated as previously described (Tian et al., 2019).

550 Cellular markers were endogenously labeled using the split-mNeonGreen2 system (Feng  
551 et al., 2017), following conditions described in (Leonetti et al., 2016). Briefly, synthetic guide  
552 RNAs (IDT, Alt-R reagents) were first complexed in vitro with purified *S. Pyogenes* Cas9  
553 protein (UC Berkeley Macrolab). Cas9/RNA complexes were then mixed with single-stranded  
554 DNA oligo donors (IDT, Ultramer reagents) and nucleofected (Lonza Cat#AAF-1002B, Amaxa  
555 program CM-130) into HEK cells stably expressing SFFV-mNeonGreen2<sub>1-10</sub>. Fluorescent cells  
556 were selected by flow cytometry (SONY biotechnology Cat# SH800S). Sequences for CRISPR  
557 RNA and donors used are listed as follows:

558

| Target               | crRNA sequence                      | Donor oligonucleotide sequence                                                                                                                                                                                                            |
|----------------------|-------------------------------------|-------------------------------------------------------------------------------------------------------------------------------------------------------------------------------------------------------------------------------------------|
| LAMP1 (C-term mNG11) | 5'-<br>GTGCACCAGGC<br>TAGATAGTC -3' | 5'-<br>CCCAGAGAAAGGAACAGAGGCCCTGCAGCTG<br>CTGTGCCTGCGTGCACCAGGCTACATCATATCG<br>GTAAAGGCCTTTTGCCACTCCTTGAAGTTGAGC<br>TCGGTACCACTTCCTGGACCTTGAAACAAAAC<br>TCCAATCCGCCACCGATAGTCTGGTAGCCTGCG<br>TGACTCCTCTTCCTGCCGACGAGGTAGGCGATG<br>AGG -3' |
| RAB7A (N-term mNG11) | 5'-<br>TAGTTTGAAGG<br>ATGACCTCT -3' | 5'-<br>TGTTTCCATCACACTCACAGTGATTCTCCTTTT<br>CCCCCTTTAGTTTGAAGGATGACCGAGCTCAAC<br>TTCAAGGAGTGGCAAAGGCCTTTACCGATATG<br>ATGGGTGGCGGATTGGAAGTTTTGTTTCAAGGT<br>CCAGGAAGTGGTACCTCTAGGAAGAAAGTGTTG<br>CTGAAGGTTATCATCCTGGGAGATTCTGGGTAA<br>G -3' |

559

560 To generate CRISPRi-HEK293T cells that monitor EGFP-Gal3 damage or only generate  
561 tau.K18(LM)-Clover2 aggregates, CRISPRi-HEK293T cells were lentivirally transduced with  
562 pMK1253 and pJC41, and a polyclonal population was sorted by FACS.

563

### 564 Primary CRISPRi screen

565 For pooled screening of libraries, 7.5 million HEK293T cells were seeded into a 15 cm<sup>2</sup> plate  
566 with complete DMEM on day 0. On day 1, 5 µg of lentiviral plasmid packaging mix (Kampmann  
567 et al., 2014) and 5 µg of pooled sgRNA library plasmid was transfected using lipofectamine  
568 2000 (ThermoFisher Cat# 11668019) and incubated for 2 days. On day 3, conditioned media was  
569 removed and filter sterilized using a Millex-GV syringe filter unit (Millipore Cat#  
570 SLGV033RB). Lentivirus was precipitated (Alstem Cat# VC100) according to manufacturer

571 protocols and resuspended in complete DMEM. 20 million FRET reporter cells were added to  
572 lentivirus-containing media and seeded into a T175 flask. On day 4, media from the T175 was  
573 replaced with DMEM complete with 2.5  $\mu\text{g}/\text{mL}$  puromycin. On day 8, Cells infected with pooled  
574 sgRNA libraries were trypsinized and replated into at 100  $\mu\text{l}$  per well (25,000 cells/well) of  
575 several 96-well plate. In addition, 0.3  $\mu\text{l}$  of 0.43  $\mu\text{g}/\mu\text{L}$  of tau fibrils were added to each well. 48  
576 hours later, cells were trypsinized and sorted using an Aria II FACS cytometer into FRET  
577 negative and FRET positive populations. Genomic DNA was isolated using a Macherey-Nagel  
578 Blood L kit (Machery-Nagel Cat# 740954.20) and followed according to manufacturer protocols.  
579 SgRNA-encoding regions were then amplified and sequenced as previously published (Gilbert et  
580 al., 2014). Phenotypes and P values for each gene were calculated using our most recent  
581 bioinformatics pipeline (<https://kampmannlab.ucsf.edu/mageck-inc> (Tian et al., 2019)). For  
582 genes targeted by more than one sgRNA library, values for the more significant phenotype were  
583 selected. Full results are listed in Table S1.

584

#### 585 **Secondary assays based on microscopy and flow cytometry**

586 To monitor tau aggregation, FRET reporter cells were seeded (25,000 cells/well) into 100  $\mu\text{L}$  per  
587 well in a 96 well black bottom plates (Greiner Bio-One #655097) with 0.3  $\mu\text{L}$  0.43 mg/mL Tau  
588 fibrils on day 1 and analyzed 24 or 48 hours after seeding. For Alzheimer's patient brain extracts,  
589 1.5  $\mu\text{L}$  extract, 0.375% total v/v Lipofectamine 2000 (ThermoFisher Cat# 11668019), and 7.85  
590  $\mu\text{L}$  OptiMEM (Thermo Cat# 31985062) were mixed and incubated at room temperature for 2  
591 hours. Lipofectamine-brain extract complexes were then added to cells previously plated in 100  
592  $\mu\text{L}$  (10,000 cells/well) for 6 hours. Cells were analyzed 5 days after seeding. For analysis, cells  
593 were stained with Hoechst 33342 (ThermoFisher Cat# 5553141) at 1  $\mu\text{g}/\text{mL}$  and analyzed by  
594 flow cytometry using a BD FACSCelesta or by fluorescence microscopy using an InCell 6000  
595 (GE Cat# 28-9938-51). Digital images were analyzed using CellProfiler by counting the  
596 integrated density of identified aggregates/nuclei and averaged between 3 images. Cells with  
597 sgRNA knockdown were similarly analyzed using a comparable protocol 5 days after  
598 transduction with individual sgRNA-encoding lentivirus.

599 For experiments measuring tau aggregation in the presence of inducers of endolysosomal  
600 damage, FRET reporter cells were seeded (25,000 cells/well) into 100  $\mu\text{L}$  per well in a 96 well  
601 black bottom plate and treated with LLOME (Sigma Cat# L7393-500MG) at varying

602 concentrations with 0.3  $\mu$ L 0.43  $\mu$ g/ $\mu$ L Tau fibrils. For treatment with lipofectamine 2000, FRET  
603 reporter cells were seeded (25,000 cells/well) into 100  $\mu$ L per well in a 96 well black bottom  
604 plate and treated with Lipofectamine 2000 at varying concentrations. Cells were then treated 0.3  
605  $\mu$ L 0.43  $\mu$ g/ $\mu$ L Tau fibrils 6 hours later. 24 or 48 hours later after seeding, cells were stained with  
606 Hoechst 33342 (1  $\mu$ g/mL) and analyzed by flow cytometry using a BD FACSCelesta or by  
607 fluorescence microscopy using an InCell 6000 GE (Cat# 28-9938-51). Digital images were  
608 collected and analyzed using CellProfiler by quantifying the integrated density of identified  
609 aggregates and Hoechst-stained nuclei. In cases where CellProfiler was unable to identify nuclei,  
610 nuclei were counted interactively using ImageJ. Cells with sgRNA knockdown were similarly  
611 analyzed using a comparable protocol 5 days after transduction with individual sgRNA-encoding  
612 lentivirus.

613 To monitor tau fibril uptake, on day 0, CRISPRi-HEK293T cells previously transduced  
614 for 5 days with lentivirus expressing single sgRNAs were seeded (25,000 cells/well) into 100  $\mu$ L  
615 per well in a 96-well plate. On day 1, cells were treated with 1  $\mu$ L 0.39  $\mu$ g/ $\mu$ L AF555-tau fibril  
616 for 1 hr at 37  $^{\circ}$ C and collected for analysis by flow cytometry. Median mRuby2 values were  
617 calculated in FlowJo and averaged between 3 technical replicates.

618 To monitor tau.K18(LM)-Clover2 steady-state levels, on day 0, FRET reporter cells  
619 previously transduced for 5 days with lentivirus expressing single sgRNAs were seeded (25,000  
620 cells/well) into 100  $\mu$ L per well in a 96-well plate. On day 1, cells collected for analysis by flow  
621 cytometry. Median Clover2 values were calculated in FlowJo and averaged between 3 technical  
622 replicates.

623 To monitor localization of AF555-labeled tau fibrils, HEK293T cells expressing  
624 Tau.K18(LM)-Clover2 were seeded (12,500 cells/well) into 100  $\mu$ L per well in a 96-well black  
625 bottom plate (Greiner Bio-One #655097) on day 0 in complete DMEM. On day 1, 0.3  $\mu$ L 0.39  
626  $\mu$ g/ $\mu$ L AF555-tau fibrils were added to cell culture media and placed into an InCell 6000 (GE  
627 Cat# 28-9938-51) incubator. Images were taken by at 20 minute intervals between incubations.

628 To monitor co-localization of tau fibrils with RAB7A and LAMP1, fluorescently labeled  
629 HEK293T cells were seeded in glass-bottom 96-well plates (Cellvis #P96-1.5P) pre-coated with  
630 fibronectin (Roche Cat# 11051407001) at 25,000 cells cells/well in 150  $\mu$ L complete DMEM  
631 media (including 10% FBS). After incubation for 3 hours to allow for cell adhesion, cells were  
632 treated with 0.11  $\mu$ g of AF555-tau PFFs per well. 22 hours post-treatment, cells were counter-

633 stained with Hoechst 33342 (0.5  $\mu\text{g}/\text{mL}$ , 30 min at 37  $^{\circ}\text{C}$ ) and imaged in complete DMEM  
634 without phenol-red. Live-cell imaging was performed on a Dragonfly spinning-disk instrument  
635 (Andor) at 37  $^{\circ}\text{C}$  in 5%  $\text{CO}_2$  atmosphere equipped with a 63x/1.47 NA objective (Leica) and an  
636 iXon Ultra 888 EMCCD camera (Andor), acquiring time-lapse datasets at 0.4Hz.

637 To monitor Gal3-EGFP puncta formation, CRISPRi-HEK293T cells expressing EGFP-  
638 Gal3 were seeded into 100  $\mu\text{L}$  per well (25,000 cells/well) in a 96 well black bottom plates and  
639 treated with LLOME or Lipofectamine at varying concentrations. 24 hours after seeding, cells  
640 were stained with Hoechst 33342 (1  $\mu\text{g}/\text{mL}$ ) and digital images were collected and analyzed by  
641 an InCell 6000 by counting EGFP-Gal3 puncta/nuclei and averaged between 3 images. Cells  
642 with sgRNA knockdown were similarly analyzed using a comparable protocol 5 days after  
643 transduction with individual sgRNA-encoding lentivirus and puromycin selection of transduced  
644 cells.

645

#### 646 **Cell fractionation and immunoblot**

647 Cells were seeded into 3 mL at 250,000 cells/well in a 6-well dishes with 4.8  $\mu\text{L}$  0.43 mg/mL tau  
648 fibrils, and harvested after 48 hours by washing with PBS and releasing with 0.25% trypsin.  
649 Cells were resuspended with DMEM pre-warmed to 37  $^{\circ}\text{C}$ , spun down and washed again with  
650 PBS. Cells were resuspended in 20  $\mu\text{L}$  PBS and lysed by flash freezing on dry ice and rapidly  
651 thawed at 42 C. This step was repeated twice. The resulting lysate was spun at 1000xg and the  
652 resulting supernatant was transferred to a new tube and respun to remove any carry-over  
653 insoluble material. The pellet was rinsed 3x with PBS and resuspended to the corresponding  
654 volume of supernatant and briefly sonicated with a tip sonicator (Sonopuls 2070) for a brief 1  
655 second pulse at 10% maximum intensity. Equivalent fractions of total volume for 100 ng  
656 supernatant and resuspended pellet were boiled with SDS loading buffer (50 mM Tris-Cl  
657 (pH6.8), 2% (2 w/v) SDS, 0.1% (w/v) bromophenol blue) and 10 mM DTT, subjected to SDS-  
658 PAGE on 4-12% Bis-Tris polyacrylamide gels (ThermoFisher Cat# NP0322BOX) and  
659 transferred to nitrocellulose membranes. Primary antibodies against human tau (DAKO Cat#  
660 A0024) and  $\beta$ -actin (Cell Signaling Cat# 3700) were used to detect proteins. Blots were then  
661 incubated with secondary antibodies (Li-Cor Cat# 926-32213 and 926-68072) and imaged on the  
662 Odyssey Fc Imaging system (Li-Cor Cat# 2800). Digital images were processed and analyzed  
663 using Licor Image Studio<sup>TM</sup> software.



664

## 665 **qRT-PCR**

666 CRISPRi-HEK293T cells expressing a constitutive non-targeting or targeting sgRNA were  
667 collected by centrifugation at 1000xg for 10 min, washed twice with ice cold PBS and processed  
668 for qPCR using a RNA purification kit (Zymo Cat# D7011). 500 ng total RNA from each sample  
669 were reverse transcribed using Superscript<sup>TM</sup> III reverse transcriptase using an oligo(dT) primer  
670 (Invitrogen Cat# 18080044). The resulting cDNA was diluted 5-fold using 10 mM Tris pH 8.0  
671 and 0.67  $\mu$ L of this dilution was used for each quantitative real-time PCR (qPCR) reaction.  
672 qPCR reactions were set up using SensiMix 2x Mastermix (Bioline Cat# QT615-20) and  
673 oligonucleotides targeting genes of interest (IDT) in triplicate and run on QuantStudio 6 Flex  
674 (Applied Biosystems Cat# 4485694) using protocols according to the mastermix manufacturer's  
675 specifications. All reactions were normalized to an internal loading control (GAPDH) and the  
676 sgRNA activity is expressed as knockdown efficiency. The qPCR primer sequences are listed in  
677 Table S2.

678

679

## 680 **AUTHOR CONTRIBUTIONS**

681 Conception and design: J.C.C., M.K.

682 Acquisition of data: J.C.C., D.T.N., P.R., M.N., E.T.

683 Analysis and interpretation of data: J.C.C., D.L.N., M.N., R.T., E.T., P.R., M.L., D.S., M.K.

684 Drafting or revising the article: J.C.C., M.K.

685 Contributing unpublished essential data or reagents: J.Y.H., S.K.S., S.M., L.T.G., J.E.G.

686

687

## 688 **ACKNOWLEDGEMENTS**

689 We thank Kathleen Keough and Nia Teerikorpi for contributing to preliminary studies. We thank  
690 all co-authors, Adam Frost, Bryce Mendelsohn, Jay Debnath, Amanda Woerman, Kartika  
691 Widjaja, Avi Samelson, Nina Dräger, Emmy Li, Poornima Ramkumar and other members of the  
692 Kampmann Lab for discussions and feedback on the manuscript. We thank Eric Chow and Derek  
693 Bogdanoff (UCSF Center for Advanced Technology) for support with next-generation  
694 sequencing and Sarah Elmes (UCSF Laboratory for Cell Analysis, supported by NIH grant P30

695 CA082103) for support with FACS. For human tissue samples, we thank Lea Grinberg, William  
696 Seeley and the Neurodegenerative Disease Brain Bank at the University of California, San  
697 Francisco, which receives funding support from NIH grants P01AG019724 and P50AG023501,  
698 the Consortium for Frontotemporal Dementia Research, and the Tau Consortium. This work was  
699 supported by NIH grants: New Innovator Award DP2 GM119139 (M.K.), R01 AG062359  
700 (M.K.), R56 AG057528 (M.K. and L.T.G.), U54 NS100717 (M.K.), S10 OD021741 (supporting  
701 electron microscopy), R01 NS059690 (J.E.G.), a Paul G. Allen Distinguished Investigator  
702 Award (M.K.), a Chan Zuckerberg Biohub Investigator Award (M.K.), a Tau Consortium  
703 Investigator Award (M.K. and J.E.G.), a QB3/Calico Longevity Postdoctoral Fellowship (J.J.C.),  
704 an Alzheimer's Association Postdoctoral Fellowship (J.J.C.), and a National Defense Science &  
705 Engineering Graduate Fellowship (S.K.S.).

706

707

## 708 REFERENCES

709

710 Abisambra, J. F., Blair, L. J., Hill, S. E., Jones, J. R., Kraft, C., Rogers, J., Koren, J., 3rd, Jinwal,  
711 U. K., Lawson, L., Johnson, A. G., Wilcock, D., O'Leary, J. C., Jansen-West, K.,  
712 Muschol, M., Golde, T. E., Weeber, E. J., Banko, J., & Dickey, C. A. (2010).  
713 Phosphorylation dynamics regulate Hsp27-mediated rescue of neuronal plasticity deficits  
714 in tau transgenic mice. *J Neurosci*, *30*(46), 15374-15382.  
715 doi:10.1523/JNEUROSCI.3155-10.2010

716 Adamson, B., Norman, T. M., Jost, M., Cho, M. Y., Nunez, J. K., Chen, Y., Villalta, J. E.,  
717 Gilbert, L. A., Horlbeck, M. A., Hein, M. Y., Pak, R. A., Gray, A. N., Gross, C. A., Dixit,  
718 A., Parnas, O., Regev, A., & Weissman, J. S. (2016). A Multiplexed Single-Cell CRISPR  
719 Screening Platform Enables Systematic Dissection of the Unfolded Protein Response.  
720 *Cell*, *167*(7), 1867-1882 e1821. doi:10.1016/j.cell.2016.11.048

721 Ait-Bouziad, N., Lv, G., Mahul-Mellier, A. L., Xiao, S., Zorludemir, G., Eliezer, D., Walz, T., &  
722 Lashuel, H. A. (2017). Discovery and characterization of stable and toxic  
723 Tau/phospholipid oligomeric complexes. *Nat Commun*, *8*(1), 1678. doi:10.1038/s41467-  
724 017-01575-4

725 Aits, S., Krickler, J., Liu, B., Ellegaard, A. M., Hamalisto, S., Tvingsholm, S., Corcelle-Termeau,  
726 E., Høgh, S., Farkas, T., Holm Jonassen, A., Gromova, I., Mortensen, M., & Jaattela, M.  
727 (2015). Sensitive detection of lysosomal membrane permeabilization by lysosomal  
728 galectin puncta assay. *Autophagy*, *11*(8), 1408-1424.  
729 doi:10.1080/15548627.2015.1063871

- 730 Baughman, H. E. R., Clouser, A. F., Klevit, R. E., & Nath, A. (2018). HspB1 and Hsc70  
731 chaperones engage distinct tau species and have different inhibitory effects on amyloid  
732 formation. *J Biol Chem*, 293(8), 2687-2700. doi:10.1074/jbc.M117.803411
- 733 Bejanin, A., Schonhaut, D. R., La Joie, R., Kramer, J. H., Baker, S. L., Sosa, N., Ayakta, N.,  
734 Cantwell, A., Janabi, M., Lauriola, M., O'Neil, J. P., Gorno-Tempini, M. L., Miller, Z. A.,  
735 Rosen, H. J., Miller, B. L., Jagust, W. J., & Rabinovici, G. D. (2017). Tau pathology and  
736 neurodegeneration contribute to cognitive impairment in Alzheimer's disease. *Brain*,  
737 140(12), 3286-3300. doi:10.1093/brain/awx243
- 738 Berg, L., McKeel, D. W., Jr., Miller, J. P., Storandt, M., Rubin, E. H., Morris, J. C., Baty, J.,  
739 Coats, M., Norton, J., Goate, A. M., Price, J. L., Gearing, M., Mirra, S. S., & Saunders,  
740 A. M. (1998). Clinicopathologic studies in cognitively healthy aging and Alzheimer's  
741 disease: relation of histologic markers to dementia severity, age, sex, and apolipoprotein  
742 E genotype. *Arch Neurol*, 55(3), 326-335.
- 743 Bult, C. J., Blake, J. A., Smith, C. L., Kadin, J. A., Richardson, J. E., & Mouse Genome  
744 Database, G. (2019). Mouse Genome Database (MGD) 2019. *Nucleic Acids Res*, 47(D1),  
745 D801-D806. doi:10.1093/nar/gky1056
- 746 Cairns, N. J., Bigio, E. H., Mackenzie, I. R., Neumann, M., Lee, V. M., Hatanpaa, K. J., White,  
747 C. L., 3rd, Schneider, J. A., Grinberg, L. T., Halliday, G., Duyckaerts, C., Lowe, J. S.,  
748 Holm, I. E., Tolnay, M., Okamoto, K., Yokoo, H., Murayama, S., Woulfe, J., Munoz, D.  
749 G., Dickson, D. W., Ince, P. G., Trojanowski, J. Q., Mann, D. M., & Consortium for  
750 Frontotemporal Lobar, D. (2007). Neuropathologic diagnostic and nosologic criteria for  
751 frontotemporal lobar degeneration: consensus of the Consortium for Frontotemporal  
752 Lobar Degeneration. *Acta Neuropathol*, 114(1), 5-22. doi:10.1007/s00401-007-0237-2
- 753 Cataldo, A. M., Peterhoff, C. M., Troncoso, J. C., Gomez-Isla, T., Hyman, B. T., & Nixon, R. A.  
754 (2000). Endocytic pathway abnormalities precede amyloid beta deposition in sporadic  
755 Alzheimer's disease and Down syndrome: differential effects of APOE genotype and  
756 presenilin mutations. *Am J Pathol*, 157(1), 277-286.
- 757 Clayton, E. L., Mizielinska, S., Edgar, J. R., Nielsen, T. T., Marshall, S., Norona, F. E., Robbins,  
758 M., Damirji, H., Holm, I. E., Johannsen, P., Nielsen, J. E., Asante, E. A., Collinge, J.,  
759 consortium, F. R., & Isaacs, A. M. (2015). Frontotemporal dementia caused by CHMP2B  
760 mutation is characterised by neuronal lysosomal storage pathology. *Acta Neuropathol*,  
761 130(4), 511-523. doi:10.1007/s00401-015-1475-3
- 762 Dickson, D. W., Bergeron, C., Chin, S. S., Duyckaerts, C., Horoupian, D., Ikeda, K., Jellinger,  
763 K., Lantos, P. L., Lippa, C. F., Mirra, S. S., Tabaton, M., Vonsattel, J. P., Wakabayashi,  
764 K., Litvan, I., & Office of Rare Diseases of the National Institutes of, H. (2002). Office of  
765 Rare Diseases neuropathologic criteria for corticobasal degeneration. *J Neuropathol Exp*  
766 *Neurol*, 61(11), 935-946.
- 767 Feng, S., Sekine, S., Pessino, V., Li, H., Leonetti, M. D., & Huang, B. (2017). Improved split  
768 fluorescent proteins for endogenous protein labeling. *Nat Commun*, 8(1), 370.  
769 doi:10.1038/s41467-017-00494-8

- 770 Frost, B., Jacks, R. L., & Diamond, M. I. (2009). Propagation of tau misfolding from the outside  
771 to the inside of a cell. *J Biol Chem*, *284*(19), 12845-12852. doi:10.1074/jbc.M808759200
- 772 Giannakopoulos, P., Herrmann, F. R., Bussiere, T., Bouras, C., Kovari, E., Perl, D. P., Morrison,  
773 J. H., Gold, G., & Hof, P. R. (2003). Tangle and neuron numbers, but not amyloid load,  
774 predict cognitive status in Alzheimer's disease. *Neurology*, *60*(9), 1495-1500.
- 775 Gilbert, L. A., Horlbeck, M. A., Adamson, B., Villalta, J. E., Chen, Y., Whitehead, E. H.,  
776 Guimaraes, C., Panning, B., Ploegh, H. L., Bassik, M. C., Qi, L. S., Kampmann, M., &  
777 Weissman, J. S. (2014). Genome-Scale CRISPR-Mediated Control of Gene Repression  
778 and Activation. *Cell*, *159*(3), 647-661. doi:10.1016/j.cell.2014.09.029
- 779 Gilbert, L. A., Larson, M. H., Morsut, L., Liu, Z., Brar, G. A., Torres, S. E., Stern-Ginossar, N.,  
780 Brandman, O., Whitehead, E. H., Doudna, J. A., Lim, W. A., Weissman, J. S., & Qi, L. S.  
781 (2013). CRISPR-mediated modular RNA-guided regulation of transcription in  
782 eukaryotes. *Cell*, *154*(2), 442-451. doi:10.1016/j.cell.2013.06.044
- 783 Gomez-Isla, T., Hollister, R., West, H., Mui, S., Growdon, J. H., Petersen, R. C., Parisi, J. E., &  
784 Hyman, B. T. (1997). Neuronal loss correlates with but exceeds neurofibrillary tangles in  
785 Alzheimer's disease. *Ann Neurol*, *41*(1), 17-24. doi:10.1002/ana.410410106
- 786 Hauw, J. J., Daniel, S. E., Dickson, D., Horoupian, D. S., Jellinger, K., Lantos, P. L., McKee, A.,  
787 Tabaton, M., & Litvan, I. (1994). Preliminary NINDS neuropathologic criteria for Steele-  
788 Richardson-Olszewski syndrome (progressive supranuclear palsy). *Neurology*, *44*(11),  
789 2015-2019.
- 790 Holmes, B. B., DeVos, S. L., Kfoury, N., Li, M., Jacks, R., Yanamandra, K., Ouidja, M. O.,  
791 Brodsky, F. M., Marasa, J., Bagchi, D. P., Kotzbauer, P. T., Miller, T. M., Papy-Garcia,  
792 D., & Diamond, M. I. (2013). Heparan sulfate proteoglycans mediate internalization and  
793 propagation of specific proteopathic seeds. *Proc Natl Acad Sci U S A*, *110*(33), E3138-  
794 3147. doi:10.1073/pnas.1301440110
- 795 Holmes, B. B., Furman, J. L., Mahan, T. E., Yamasaki, T. R., Mirbaha, H., Eades, W. C.,  
796 Belaygorod, L., Cairns, N. J., Holtzman, D. M., & Diamond, M. I. (2014). Proteopathic  
797 tau seeding predicts tauopathy in vivo. *Proc Natl Acad Sci U S A*, *111*(41), E4376-4385.  
798 doi:10.1073/pnas.1411649111
- 799 Horlbeck, M. A., Gilbert, L. A., Villalta, J. E., Adamson, B., Pak, R. A., Chen, Y., Fields, A. P.,  
800 Park, C. Y., Corn, J. E., Kampmann, M., & Weissman, J. S. (2016). Compact and highly  
801 active next-generation libraries for CRISPR-mediated gene repression and activation.  
802 *Elife*, *5*. doi:10.7554/eLife.19760
- 803 Hu, Y. B., Dammer, E. B., Ren, R. J., & Wang, G. (2015). The endosomal-lysosomal system:  
804 from acidification and cargo sorting to neurodegeneration. *Transl Neurodegener*, *4*, 18.  
805 doi:10.1186/s40035-015-0041-1
- 806 Hurley, J. H. (2015). ESCRTs are everywhere. *EMBO J*, *34*(19), 2398-2407.  
807 doi:10.15252/embj.201592484

- 808 Hyman, B. T., & Trojanowski, J. Q. (1997). Consensus recommendations for the postmortem  
809 diagnosis of Alzheimer disease from the National Institute on Aging and the Reagan  
810 Institute Working Group on diagnostic criteria for the neuropathological assessment of  
811 Alzheimer disease. *J Neuropathol Exp Neurol*, *56*(10), 1095-1097.
- 812 Kampmann, M. (2017). A CRISPR Approach to Neurodegenerative Diseases. *Trends Mol Med*,  
813 *23*(6), 483-485. doi:10.1016/j.molmed.2017.04.003
- 814 Kampmann, M. (2018). CRISPRi and CRISPRa Screens in Mammalian Cells for Precision  
815 Biology and Medicine. *ACS Chem Biol*, *13*(2), 406-416.  
816 doi:10.1021/acscchembio.7b00657
- 817 Kampmann, M., Bassik, M. C., & Weissman, J. S. (2013). Integrated platform for genome-wide  
818 screening and construction of high-density genetic interaction maps in mammalian cells.  
819 *Proc Natl Acad Sci U S A*, *110*(25), E2317-2326. doi:10.1073/pnas.1307002110
- 820 Kampmann, M., Bassik, M. C., & Weissman, J. S. (2014). Functional genomics platform for  
821 pooled screening and generation of mammalian genetic interaction maps. *Nat Protoc*,  
822 *9*(8), 1825-1847. doi:10.1038/nprot.2014.103
- 823 Kaufman, S. K., Sanders, D. W., Thomas, T. L., Ruchinskas, A. J., Vaquer-Alicea, J., Sharma,  
824 A. M., Miller, T. M., & Diamond, M. I. (2016). Tau Prion Strains Dictate Patterns of Cell  
825 Pathology, Progression Rate, and Regional Vulnerability In Vivo. *Neuron*, *92*(4), 796-  
826 812. doi:10.1016/j.neuron.2016.09.055
- 827 Kfoury, N., Holmes, B. B., Jiang, H., Holtzman, D. M., & Diamond, M. I. (2012). Trans-cellular  
828 propagation of Tau aggregation by fibrillar species. *J Biol Chem*, *287*(23), 19440-19451.  
829 doi:10.1074/jbc.M112.346072
- 830 Kumar, N., Leonzino, M., Hancock-Cerutti, W., Horenkamp, F. A., Li, P., Lees, J. A., Wheeler,  
831 H., Reinisch, K. M., & De Camilli, P. (2018). VPS13A and VPS13C are lipid transport  
832 proteins differentially localized at ER contact sites. *J Cell Biol*, *217*(10), 3625-3639.  
833 doi:10.1083/jcb.201807019
- 834 Kundel, F., De, S., Flagmeier, P., Horrocks, M. H., Kjaergaard, M., Shammass, S. L., Jackson, S.  
835 E., Dobson, C. M., & Klenerman, D. (2018). Hsp70 Inhibits the Nucleation and  
836 Elongation of Tau and Sequesters Tau Aggregates with High Affinity. *ACS Chem Biol*,  
837 *13*(3), 636-646. doi:10.1021/acscchembio.7b01039
- 838 Lam, A. J., St-Pierre, F., Gong, Y., Marshall, J. D., Cranfill, P. J., Baird, M. A., McKeown, M.  
839 R., Wiedenmann, J., Davidson, M. W., Schnitzer, M. J., Tsien, R. Y., & Lin, M. Z.  
840 (2012). Improving FRET dynamic range with bright green and red fluorescent proteins.  
841 *Nat Methods*, *9*(10), 1005-1012. doi:10.1038/nmeth.2171
- 842 Leonetti, M. D., Sekine, S., Kamiyama, D., Weissman, J. S., & Huang, B. (2016). A scalable  
843 strategy for high-throughput GFP tagging of endogenous human proteins. *Proc Natl Acad  
844 Sci U S A*, *113*(25), E3501-3508. doi:10.1073/pnas.1606731113

- 845 Lesage, S., Drouet, V., Majounie, E., Deramecourt, V., Jacoupy, M., Nicolas, A., Cormier-  
846 Dequaire, F., Hassoun, S. M., Pujol, C., Ciura, S., Erpapazoglou, Z., Usenko, T.,  
847 Maurage, C. A., Sahbatou, M., Liebau, S., Ding, J., Bilgic, B., Emre, M., Erginel-  
848 Unaltuna, N., Guven, G., Tison, F., Tranchant, C., Vidailhet, M., Corvol, J. C., Krack, P.,  
849 Leutenegger, A. L., Nalls, M. A., Hernandez, D. G., Heutink, P., Gibbs, J. R., Hardy, J.,  
850 Wood, N. W., Gasser, T., Durr, A., Deleuze, J. F., Tazir, M., Destee, A., Lohmann, E.,  
851 Kabashi, E., Singleton, A., Corti, O., Brice, A., French Parkinson's Disease Genetics, S.,  
852 & International Parkinson's Disease Genomics, C. (2016). Loss of VPS13C Function in  
853 Autosomal-Recessive Parkinsonism Causes Mitochondrial Dysfunction and Increases  
854 PINK1/Parkin-Dependent Mitophagy. *Am J Hum Genet*, *98*(3), 500-513.  
855 doi:10.1016/j.ajhg.2016.01.014
- 856 Maejima, I., Takahashi, A., Omori, H., Kimura, T., Takabatake, Y., Saitoh, T., Yamamoto, A.,  
857 Hamasaki, M., Noda, T., Isaka, Y., & Yoshimori, T. (2013). Autophagy sequesters  
858 damaged lysosomes to control lysosomal biogenesis and kidney injury. *EMBO J*, *32*(17),  
859 2336-2347. doi:10.1038/emboj.2013.171
- 860 McKeith, I. G., Dickson, D. W., Lowe, J., Emre, M., O'Brien, J. T., Feldman, H., Cummings, J.,  
861 Duda, J. E., Lippa, C., Perry, E. K., Aarsland, D., Arai, H., Ballard, C. G., Boeve, B.,  
862 Burn, D. J., Costa, D., Del Ser, T., Dubois, B., Galasko, D., Gauthier, S., Goetz, C. G.,  
863 Gomez-Tortosa, E., Halliday, G., Hansen, L. A., Hardy, J., Iwatsubo, T., Kalaria, R. N.,  
864 Kaufer, D., Kenny, R. A., Korczyn, A., Kosaka, K., Lee, V. M., Lees, A., Litvan, I.,  
865 Londos, E., Lopez, O. L., Minoshima, S., Mizuno, Y., Molina, J. A., Mukaetova-  
866 Ladinska, E. B., Pasquier, F., Perry, R. H., Schulz, J. B., Trojanowski, J. Q., Yamada, M.,  
867 & Consortium on, D. L. B. (2005). Diagnosis and management of dementia with Lewy  
868 bodies: third report of the DLB Consortium. *Neurology*, *65*(12), 1863-1872.  
869 doi:10.1212/01.wnl.0000187889.17253.b1
- 870 Mirbaha, H., Holmes, B. B., Sanders, D. W., Bieschke, J., & Diamond, M. I. (2015). Tau  
871 Trimers Are the Minimal Propagation Unit Spontaneously Internalized to Seed  
872 Intracellular Aggregation. *J Biol Chem*, *290*(24), 14893-14903.  
873 doi:10.1074/jbc.M115.652693
- 874 Mok, S. A., Condello, C., Freilich, R., Gillies, A., Arhar, T., Oroz, J., Kadavath, H., Julien, O.,  
875 Assimon, V. A., Rauch, J. N., Duniak, B. M., Lee, J., Tsai, F. T. F., Wilson, M. R.,  
876 Zweckstetter, M., Dickey, C. A., & Gestwicki, J. E. (2018). Mapping interactions with  
877 the chaperone network reveals factors that protect against tau aggregation. *Nat Struct Mol*  
878 *Biol*, *25*(5), 384-393. doi:10.1038/s41594-018-0057-1
- 879 Montine, T. J., Phelps, C. H., Beach, T. G., Bigio, E. H., Cairns, N. J., Dickson, D. W.,  
880 Duyckaerts, C., Frosch, M. P., Masliah, E., Mirra, S. S., Nelson, P. T., Schneider, J. A.,  
881 Thal, D. R., Trojanowski, J. Q., Vinters, H. V., Hyman, B. T., National Institute on, A., &  
882 Alzheimer's, A. (2012). National Institute on Aging-Alzheimer's Association guidelines  
883 for the neuropathologic assessment of Alzheimer's disease: a practical approach. *Acta*  
884 *Neuropathol*, *123*(1), 1-11. doi:10.1007/s00401-011-0910-3

- 885 Nonaka, T., Watanabe, S. T., Iwatsubo, T., & Hasegawa, M. (2010). Seeded aggregation and  
886 toxicity of {alpha}-synuclein and tau: cellular models of neurodegenerative diseases. *J*  
887 *Biol Chem*, 285(45), 34885-34898. doi:10.1074/jbc.M110.148460
- 888 Prusiner, S. B. (1982). Novel proteinaceous infectious particles cause scrapie. *Science*,  
889 216(4542), 136-144.
- 890 Rampoldi, L., Dobson-Stone, C., Rubio, J. P., Danek, A., Chalmers, R. M., Wood, N. W.,  
891 Verellen, C., Ferrer, X., Malandrini, A., Fabrizi, G. M., Brown, R., Vance, J., Pericak-  
892 Vance, M., Rudolf, G., Carre, S., Alonso, E., Manfredi, M., Nemeth, A. H., & Monaco,  
893 A. P. (2001). A conserved sorting-associated protein is mutant in chorea-acanthocytosis.  
894 *Nat Genet*, 28(2), 119-120. doi:10.1038/88821
- 895 Rauch, J. N., Chen, J. J., Sorum, A. W., Miller, G. M., Sharf, T., See, S. K., Hsieh-Wilson, L. C.,  
896 Kampmann, M., & Kosik, K. S. (2018). Tau Internalization is Regulated by 6-O Sulfation  
897 on Heparan Sulfate Proteoglycans (HSPGs). *Sci Rep*, 8(1), 6382. doi:10.1038/s41598-  
898 018-24904-z
- 899 Sanders, D. W., Kaufman, S. K., DeVos, S. L., Sharma, A. M., Mirbaha, H., Li, A., Barker, S. J.,  
900 Foley, A. C., Thorpe, J. R., Serpell, L. C., Miller, T. M., Grinberg, L. T., Seeley, W. W.,  
901 & Diamond, M. I. (2014). Distinct tau prion strains propagate in cells and mice and  
902 define different tauopathies. *Neuron*, 82(6), 1271-1288.  
903 doi:10.1016/j.neuron.2014.04.047
- 904 Schreij, A. M., Fon, E. A., & McPherson, P. S. (2016). Endocytic membrane trafficking and  
905 neurodegenerative disease. *Cell Mol Life Sci*, 73(8), 1529-1545. doi:10.1007/s00018-015-  
906 2105-x
- 907 Seong, E., Insolera, R., Dulovic, M., Kamsteeg, E. J., Trinh, J., Bruggemann, N., Sandford, E.,  
908 Li, S., Ozel, A. B., Li, J. Z., Jewett, T., Kievit, A. J. A., Munchau, A., Shakkottai, V.,  
909 Klein, C., Collins, C. A., Lohmann, K., van de Warrenburg, B. P., & Burmeister, M.  
910 (2018). Mutations in VPS13D lead to a new recessive ataxia with spasticity and  
911 mitochondrial defects. *Ann Neurol*, 83(6), 1075-1088. doi:10.1002/ana.25220
- 912 Skibinski, G., Parkinson, N. J., Brown, J. M., Chakrabarti, L., Lloyd, S. L., Hummerich, H.,  
913 Nielsen, J. E., Hodges, J. R., Spillantini, M. G., Thusgaard, T., Brandner, S., Brun, A.,  
914 Rossor, M. N., Gade, A., Johannsen, P., Sorensen, S. A., Gydesen, S., Fisher, E. M., &  
915 Collinge, J. (2005). Mutations in the endosomal ESCRTIII-complex subunit CHMP2B in  
916 frontotemporal dementia. *Nat Genet*, 37(8), 806-808. doi:10.1038/ng1609
- 917 Skowrya, M. L., Schlesinger, P. H., Naismith, T. V., & Hanson, P. I. (2018). Triggered  
918 recruitment of ESCRT machinery promotes endolysosomal repair. *Science*, 360(6384).  
919 doi:10.1126/science.aar5078
- 920 Small, S. A., Simoes-Spassov, S., Mayeux, R., & Petsko, G. A. (2017). Endosomal Traffic Jams  
921 Represent a Pathogenic Hub and Therapeutic Target in Alzheimer's Disease. *Trends*  
922 *Neurosci*, 40(10), 592-602. doi:10.1016/j.tins.2017.08.003

- 923 Stöhr, J., Wu, H., Nick, M., Wu, Y., Bhate, M., Condello, C., Johnson, N., Rodgers, J., Lemmin,  
924 T., Acharya, S., Becker, J., Robinson, K., Kelly, M. J. S., Gai, F., Stubbs, G., Prusiner, S.  
925 B., & DeGrado, W. F. (2017). A 31-residue peptide induces aggregation of tau's  
926 microtubule-binding region in cells. *Nat Chem*, 9(9), 874-881. doi:10.1038/nchem.2754
- 927 Stopschinski, B. E., Holmes, B. B., Miller, G. M., Manon, V. A., Vaquer-Alicea, J., Prueitt, W.  
928 L., Hsieh-Wilson, L. C., & Diamond, M. I. (2018). Specific glycosaminoglycan chain  
929 length and sulfation patterns are required for cell uptake of tau versus alpha-synuclein  
930 and beta-amyloid aggregates. *J Biol Chem*, 293(27), 10826-10840.  
931 doi:10.1074/jbc.RA117.000378
- 932 Tartaglia, M. C., Sidhu, M., Laluz, V., Racine, C., Rabinovici, G. D., Creighton, K., Karydas, A.,  
933 Rademakers, R., Huang, E. J., Miller, B. L., DeArmond, S. J., & Seeley, W. W. (2010).  
934 Sporadic corticobasal syndrome due to FTLTD-TDP. *Acta Neuropathol*, 119(3), 365-374.  
935 doi:10.1007/s00401-009-0605-1
- 936 Thiele, D. L., & Lipsky, P. E. (1990). Mechanism of L-leucyl-L-leucine methyl ester-mediated  
937 killing of cytotoxic lymphocytes: dependence on a lysosomal thiol protease, dipeptidyl  
938 peptidase I, that is enriched in these cells. *Proc Natl Acad Sci U S A*, 87(1), 83-87.
- 939 Tian, R., Gachechiladze, M. A., Ludwig, C. H., Laurie, M. T., Hong, J. Y., Nathaniel, D.,  
940 Prabhu, A. V., Fernandopulle, M. S., Patel, R., Ward, M. E., & Kampmann, M. (2019).  
941 CRISPR-based platform for multimodal genetic screens in human iPSC-derived neurons.  
942 *bioRxiv*, 513309; doi: <https://doi.org/10.1101/513309>.
- 943 Tsherniak, A., Vazquez, F., Montgomery, P. G., Weir, B. A., Kryukov, G., Cowley, G. S., Gill,  
944 S., Harrington, W. F., Pantel, S., Krill-Burger, J. M., Meyers, R. M., Ali, L., Goodale, A.,  
945 Lee, Y., Jiang, G., Hsiao, J., Gerath, W. F. J., Howell, S., Merkel, E., Ghandi, M.,  
946 Garraway, L. A., Root, D. E., Golub, T. R., Boehm, J. S., & Hahn, W. C. (2017).  
947 Defining a Cancer Dependency Map. *Cell*, 170(3), 564-576 e516.  
948 doi:10.1016/j.cell.2017.06.010
- 949 Ueno, S., Maruki, Y., Nakamura, M., Tomemori, Y., Kamae, K., Tanabe, H., Yamashita, Y.,  
950 Matsuda, S., Kaneko, S., & Sano, A. (2001). The gene encoding a newly discovered  
951 protein, chorein, is mutated in chorea-acanthocytosis. *Nat Genet*, 28(2), 121-122.  
952 doi:10.1038/88825
- 953 Urwin, H., Authier, A., Nielsen, J. E., Metcalf, D., Powell, C., Froud, K., Malcolm, D. S., Holm,  
954 I., Johannsen, P., Brown, J., Fisher, E. M., van der Zee, J., Bruyland, M., Consortium, F.  
955 R., Van Broeckhoven, C., Collinge, J., Brandner, S., Fütter, C., & Isaacs, A. M. (2010).  
956 Disruption of endocytic trafficking in frontotemporal dementia with CHMP2B mutations.  
957 *Hum Mol Genet*, 19(11), 2228-2238. doi:10.1093/hmg/ddq100
- 958 Vaquer-Alicea, J., & Diamond, M. I. (2019). Propagation of Protein Aggregation in  
959 Neurodegenerative Diseases. *Annu Rev Biochem*. doi:10.1146/annurev-biochem-061516-  
960 045049



- 961 Velayos-Baeza, A., Vettori, A., Copley, R. R., Dobson-Stone, C., & Monaco, A. P. (2004).  
962 Analysis of the human VPS13 gene family. *Genomics*, *84*(3), 536-549.  
963 doi:10.1016/j.ygeno.2004.04.012
- 964 Voss, K., Combs, B., Patterson, K. R., Binder, L. I., & Gamblin, T. C. (2012). Hsp70 alters tau  
965 function and aggregation in an isoform specific manner. *Biochemistry*, *51*(4), 888-898.  
966 doi:10.1021/bi2018078
- 967 Wang, Y., & Mandelkow, E. (2016). Tau in physiology and pathology. *Nat Rev Neurosci*, *17*(1),  
968 5-21. doi:10.1038/nrn.2015.1
- 969 Woerman, A. L., Aoyagi, A., Patel, S., Kazmi, S. A., Lobach, I., Grinberg, L. T., McKee, A. C.,  
970 Seeley, W. W., Olson, S. H., & Prusiner, S. B. (2016). Tau prions from Alzheimer's  
971 disease and chronic traumatic encephalopathy patients propagate in cultured cells. *Proc*  
972 *Natl Acad Sci U S A*, *113*(50), E8187-E8196. doi:10.1073/pnas.1616344113
- 973 Yan, X., Uronen, R. L., & Huttunen, H. J. (2018). The interaction of alpha-synuclein and Tau: A  
974 molecular conspiracy in neurodegeneration? *Semin Cell Dev Biol*.  
975 doi:10.1016/j.semcdb.2018.05.005
- 976 Yeshaw, W. M., van der Zwaag, M., Pinto, F., Lahaye, L. L., Faber, A. I., Gomez-Sanchez, R.,  
977 Dolga, A. M., Poland, C., Monaco, A. P., van, I. S. C., Grzeschik, N. A., Velayos-Baeza,  
978 A., & Sibon, O. C. (2019). Human VPS13A is associated with multiple organelles and  
979 influences mitochondrial morphology and lipid droplet motility. *Elife*, *8*.  
980 doi:10.7554/eLife.43561
- 981 Young, Z. T., Mok, S. A., & Gestwicki, J. E. (2018). Therapeutic Strategies for Restoring Tau  
982 Homeostasis. *Cold Spring Harb Perspect Med*, *8*(1). doi:10.1101/cshperspect.a024612
- 983 Zhou, X., & Huang, L. (1994). DNA transfection mediated by cationic liposomes containing  
984 lipopolylysine: characterization and mechanism of action. *Biochim Biophys Acta*,  
985 *1189*(2), 195-203.  
986

987 **SUPPLEMENTAL TABLE AND MOVIE LEGENDS**

988

989 **Table S1 – Gene epsilon and p values for CRISPRi screens**

990 Excel spreadsheet containing the combined analyzed results for the CRISPRi screens performed  
991 with the Proteostasis-focused sgRNA libraries. The counts for each library screen were analyzed  
992 using our MaGecK-iNC pipeline (see materials and methods). (**Tab 1**) The columns list the gene  
993 index, epsilon (phenotype, where negative values indicate less aggregation, positive values  
994 indicate more aggregation, p-value, product (epsilon\*–log<sub>10</sub> p-value), and gene name. NTC  
995 indicate “quasi-genes” composed of random sets of 5 non-targeting negative control sgRNAs.

996

997 **Table S2 – sgRNA sequences and validation**

998 (**Tabs 1-3**) List of sgRNA targets and accompanying protospacers used for CRISPRi screens.  
999 The columns list the target and protospacer. (Tab 1) Endolysosome/Autophagy (Tab 2)  
1000 Chaperones/Co-chaperone (Tab 3) Ubiquitin Proteasome System. (**Tab 1,2**) Validation of target  
1001 gene knockdown by CRISPRi. (Tab 4) Columns list sgRNA activity, which is expressed as  
1002 percent knockdown, standard error from n=3 technical replicates, and sgRNA oligos used in  
1003 experiments for single sgRNA analysis. The columns list the sgRNA, % knockdown efficiency,  
1004 standard error from n=3 technical replicates, forward oligo, and reverse oligos (used for  
1005 generating lentiviral sgRNA expression plasmids. (Tab 4) Oligonucleotides used for RT-qPCR  
1006 analysis. The columns list the gene target, forward, and reverse primer.

1007

1008 **Supplemental Movie 1 – Time-lapse of tau aggregate formation in HEK293T cells**

1009 **expressing tau.K18(LM)-Clover2 and transduced with non-targeting control sgRNA**

1010 Time-lapse microscopy of cell entry of AF555-tau fibrils and resulting aggregation of the  
1011 cytosolic tau-clover2 construct. CRISPRi-HEK293T cells expressing tau.K18(LM)-clover2  
1012 transduced with a non-targeting control. Each frame represents 20 minute intervals and is played  
1013 at 5 frames per second; movie starts with the addition of fibrils.

1014

1015 **Supplemental Movie 2 - Time-lapse of tau aggregate formation in HEK293T cells**

1016 **expressing tau.K18(LM)-Clover2 and transduced with CHMP6 sgRNA**

1017 Time-lapse microscopy of cell entry of AF555-tau fibrils and resulting aggregation of the  
1018 cytosolic tau-clover2 construct. CRISPRi-HEK293T cells expressing tau.K18(LM)-clover2  
1019 transduced with a CHMP6 sgRNA. Each frame represents 20 minute intervals and is played at 5  
1020 frames per second; movie starts with the addition of fibrils.

1021

1022 **Supplemental Movie 3 – Time-lapse of AF555-tau fibrils in cells expressing tagged mNG<sub>11</sub>-**  
1023 **RAB7A**

1024 Time-lapse microscopy of partial co-localization of AF555-tau fibrils with RAB7A tagged  
1025 vesicles. HEK293T cells with tagged mNG<sub>11</sub>-RAB7A were treated with AF555-tau fibrils for 22  
1026 hours before movies were acquired. Each frame represents 2.4 second intervals and is played at 5  
1027 frames per second.

1028

1029 **Supplemental Movie 4 – Time-lapse of AF555-tau fibrils in cells expressing tagged mNG<sub>11</sub>-**  
1030 **LAMP1**

1031 Time-lapse microscopy of partial co-localization of AF555-tau fibrils with RAB7A tagged  
1032 vesicles. HEK293T cells with tagged mNG<sub>11</sub>-LAMP1 were treated with AF555-tau fibrils for 22  
1033 hours before movies were acquired. Each frame represents 2.4 second intervals and is played at 5  
1034 frames per second.
